# Supplementary material
Source: publisher figshare collection journal article supplement (https://acs.figshare.com/ndownloader/files/3904576)
Supplement: Supplementary file 1 [file 3904576]

  
data_Compound_1 
  
_audit_creation_method            SHELXL-97 
_chemical_name_systematic 
; 
 ? 
; 
_chemical_name_common             ? 
_chemical_melting_point           ? 
_chemical_formula_moiety           'C162 H240 Cl2 Dy6 N12 Ni6 O61'  
_chemical_formula_sum 
 'C162 H240 Cl2 Dy6 N12 Ni6 O61' 
_chemical_formula_weight          4729.70 
  
loop_ 
 _atom_type_symbol 
 _atom_type_description 
 _atom_type_scat_dispersion_real 
 _atom_type_scat_dispersion_imag 
 _atom_type_scat_source 
 'C'  'C'   0.0033   0.0016 
 'International Tables Vol C Tables 4.2.6.8 and 6.1.1.4' 
 'H'  'H'   0.0000   0.0000 
 'International Tables Vol C Tables 4.2.6.8 and 6.1.1.4' 
 'N'  'N'   0.0061   0.0033 
 'International Tables Vol C Tables 4.2.6.8 and 6.1.1.4' 
 'O'  'O'   0.0106   0.0060 
 'International Tables Vol C Tables 4.2.6.8 and 6.1.1.4' 
 'Cl'  'Cl'   0.1484   0.1585 
 'International Tables Vol C Tables 4.2.6.8 and 6.1.1.4' 
 'Ni'  'Ni'   0.3393   1.1124 
 'International Tables Vol C Tables 4.2.6.8 and 6.1.1.4' 
 'Dy'  'Dy'  -0.1892   4.4098 
 'International Tables Vol C Tables 4.2.6.8 and 6.1.1.4' 
  
_symmetry_cell_setting            Trigonal 
_symmetry_space_group_name_H-M    P-3c1 
  
loop_ 
 _symmetry_equiv_pos_as_xyz 
 'x, y, z' 
 '-y, x-y, z' 
 '-x+y, -x, z' 
 'x-y, -y, -z+1/2' 
 '-x, -x+y, -z+1/2' 
 'y, x, -z+1/2' 
 '-x, -y, -z' 
 'y, -x+y, -z' 
 'x-y, x, -z' 
 '-x+y, y, z-1/2' 
 'x, x-y, z-1/2' 
 '-y, -x, z-1/2' 
  
_cell_length_a                    25.048(5) 
_cell_length_b                    25.048(5) 
_cell_length_c                    22.985(5) 
_cell_angle_alpha                 90.000(5) 
_cell_angle_beta                  90.000(5) 
_cell_angle_gamma                 120.000(5) 
_cell_volume                      12489(4) 
_cell_formula_units_Z             2 
_cell_measurement_temperature     100(2) 
_cell_measurement_reflns_used     5494 
_cell_measurement_theta_min       2.41 
_cell_measurement_theta_max       23.98 
  
_exptl_crystal_description        block	 
_exptl_crystal_colour             green 
_exptl_crystal_size_max           0.22 
_exptl_crystal_size_mid           0.20 
_exptl_crystal_size_min           0.18 
_exptl_crystal_density_meas       ? 
_exptl_crystal_density_diffrn     1.258 
_exptl_crystal_density_method     'not measured' 
_exptl_crystal_F_000              4764
_exptl_absorpt_coefficient_mu     2.297 
_exptl_absorpt_correction_type    empirical 
_exptl_absorpt_correction_T_min   0.419563 
_exptl_absorpt_correction_T_max   1.00 
_exptl_absorpt_process_details    sadabs 
  
_exptl_special_details 
; 
 ? 
; 
  
_diffrn_ambient_temperature       100(2) 
_diffrn_radiation_wavelength      0.71069 
_diffrn_radiation_type            MoK\a 
_diffrn_radiation_source          'fine-focus sealed tube' 
_diffrn_radiation_monochromator   graphite 
_diffrn_measurement_device_type   'CCD area detector' 
_diffrn_measurement_method        'phi and omega scans' 
_diffrn_detector_area_resol_mean  ? 
_diffrn_standards_number          ? 
_diffrn_standards_interval_count  ? 
_diffrn_standards_interval_time   ? 
_diffrn_standards_decay_%         ? 
_diffrn_reflns_number             65619 
_diffrn_reflns_av_R_equivalents   0.0795 
_diffrn_reflns_av_sigmaI/netI     0.0429 
_diffrn_reflns_limit_h_min        -30 
_diffrn_reflns_limit_h_max        29 
_diffrn_reflns_limit_k_min        -30 
_diffrn_reflns_limit_k_max        30 
_diffrn_reflns_limit_l_min        -27 
_diffrn_reflns_limit_l_max        12 
_diffrn_reflns_theta_min          1.63 
_diffrn_reflns_theta_max          25.50 
_reflns_number_total              7773 
_reflns_number_gt                 6414 
_reflns_threshold_expression      >2sigma(I) 
  
_computing_data_collection        'Bruker SMART' 
_computing_cell_refinement        'Bruker SMART' 
_computing_data_reduction         'Bruker SAINT' 
_computing_structure_solution     'SHELXS-97 (Sheldrick, 1990)' 
_computing_structure_refinement   'SHELXL-97 (Sheldrick, 1997)' 
_computing_molecular_graphics     'Bruker SHELXTL' 
_computing_publication_material   'Bruker SHELXTL' 
  
_refine_special_details 
; 
 Refinement of F^2^ against ALL reflections.  The weighted R-factor wR and 
 goodness of fit S are based on F^2^, conventional R-factors R are based 
 on F, with F set to zero for negative F^2^. The threshold expression of 
 F^2^ > 2sigma(F^2^) is used only for calculating R-factors(gt) etc. and is 
 not relevant to the choice of reflections for refinement.  R-factors based 
 on F^2^ are statistically about twice as large as those based on F, and R- 
 factors based on ALL data will be even larger. 
; 
  
_refine_ls_structure_factor_coef  Fsqd 
_refine_ls_matrix_type            full 
_refine_ls_weighting_scheme       calc 
_refine_ls_weighting_details 
 'calc w=1/[\s^2^(Fo^2^)+(0.0950P)^2^+3.5847P] where P=(Fo^2^+2Fc^2^)/3' 
_atom_sites_solution_primary      direct 
_atom_sites_solution_secondary    difmap 
_atom_sites_solution_hydrogens    geom 
_refine_ls_hydrogen_treatment     mixed 
_refine_ls_extinction_method      none 
_refine_ls_extinction_coef        ? 
_refine_ls_number_reflns          7773 
_refine_ls_number_parameters      388 
_refine_ls_number_restraints      13 
_refine_ls_R_factor_all           0.0588 
_refine_ls_R_factor_gt            0.0488 
_refine_ls_wR_factor_ref          0.1464 
_refine_ls_wR_factor_gt           0.1385 
_refine_ls_goodness_of_fit_ref    1.081 
_refine_ls_restrained_S_all       1.085 
_refine_ls_shift/su_max           0.002 
_refine_ls_shift/su_mean          0.000 
  
loop_ 
 _atom_site_label 
 _atom_site_type_symbol 
 _atom_site_fract_x 
 _atom_site_fract_y 
 _atom_site_fract_z 
 _atom_site_U_iso_or_equiv 
 _atom_site_adp_type 
 _atom_site_occupancy 
 _atom_site_symmetry_multiplicity 
 _atom_site_calc_flag 
 _atom_site_refinement_flags 
 _atom_site_disorder_assembly 
 _atom_site_disorder_group 
Dy1 Dy 0.585744(11) 0.239646(10) 0.572768(11) 0.02206(12) Uani 1 1 d . . . 
Ni1 Ni 0.50028(3) 0.30877(3) 0.54958(3) 0.02314(18) Uani 1 1 d . . . 
O5 O 0.6667 0.3333 0.6156(3) 0.0250(14) Uani 1 3 d S . . 
O6 O 0.67352(16) 0.26193(15) 0.52323(17) 0.0219(8) Uani 1 1 d D . . 
O2 O 0.56588(17) 0.22657(17) 0.68488(17) 0.0271(8) Uani 1 1 d . . . 
O3 O 0.49682(16) 0.12667(15) 0.59790(16) 0.0267(8) Uani 1 1 d . . . 
O7 O 0.52368(17) 0.19736(16) 0.49280(17) 0.0287(9) Uani 1 1 d . . . 
O4 O 0.61459(15) 0.16932(15) 0.59928(16) 0.0235(8) Uani 1 1 d . . . 
O1 O 0.51297(15) 0.25656(16) 0.60873(15) 0.0243(8) Uani 1 1 d . . . 
N2 N 0.4753(2) 0.3579(2) 0.4882(2) 0.0283(10) Uani 1 1 d . . . 
O8 O 0.45702(16) 0.23252(16) 0.49454(16) 0.0297(9) Uani 1 1 d . . . 
C20 C 0.5151(2) 0.0886(2) 0.6228(2) 0.0243(11) Uani 1 1 d . . . 
C14 C 0.4766(3) 0.1991(2) 0.4737(3) 0.0327(13) Uani 1 1 d . . . 
C2 C 0.5041(2) 0.2068(2) 0.6967(2) 0.0258(12) Uani 1 1 d . . . 
C26 C 0.5791(2) 0.1132(2) 0.6232(2) 0.0245(11) Uani 1 1 d . . . 
C6 C 0.4147(2) 0.2072(2) 0.6574(2) 0.0277(12) Uani 1 1 d . . . 
C9 C 0.3836(2) 0.2250(2) 0.6116(3) 0.0305(13) Uani 1 1 d . . . 
H9A H 0.3775 0.2004 0.5770 0.037 Uiso 1 1 calc R . . 
H9B H 0.3434 0.2158 0.6256 0.037 Uiso 1 1 calc R . . 
C5 C 0.3816(2) 0.1716(3) 0.7047(3) 0.0319(13) Uani 1 1 d . . . 
H5 H 0.3404 0.1608 0.7085 0.038 Uiso 1 1 calc R . . 
N1 N 0.4202(2) 0.2920(2) 0.5957(2) 0.0275(10) Uani 1 1 d . . . 
C22 C 0.5001(2) -0.0039(2) 0.6689(2) 0.0284(12) Uani 1 1 d . . . 
C27 C 0.4587(3) -0.0671(2) 0.6947(3) 0.0365(14) Uani 1 1 d . . . 
H27A H 0.4394 -0.0966 0.6640 0.055 Uiso 1 1 calc R . . 
H27B H 0.4276 -0.0660 0.7182 0.055 Uiso 1 1 calc R . . 
H27C H 0.4828 -0.0787 0.7184 0.055 Uiso 1 1 calc R . . 
C15 C 0.4434(3) 0.1593(3) 0.4211(3) 0.0399(15) Uani 1 1 d . . . 
C19 C 0.4317(2) 0.1008(2) 0.5906(3) 0.0304(13) Uani 1 1 d . . . 
H19A H 0.4155 0.0633 0.5685 0.046 Uiso 1 1 calc R . . 
H19B H 0.4238 0.1296 0.5702 0.046 Uiso 1 1 calc R . . 
H19C H 0.4122 0.0921 0.6280 0.046 Uiso 1 1 calc R . . 
C4 C 0.4073(3) 0.1514(3) 0.7464(3) 0.0347(14) Uani 1 1 d . . . 
C17 C 0.4816(5) 0.1884(4) 0.3688(3) 0.076(3) Uani 1 1 d . . . 
H17A H 0.4910 0.2305 0.3663 0.114 Uiso 1 1 calc R . . 
H17B H 0.4593 0.1665 0.3347 0.114 Uiso 1 1 calc R . . 
H17C H 0.5192 0.1872 0.3715 0.114 Uiso 1 1 calc R . . 
C1 C 0.6004(3) 0.2148(3) 0.7282(3) 0.0323(13) Uani 1 1 d . . . 
H1A H 0.5978 0.2319 0.7648 0.048 Uiso 1 1 calc R . . 
H1B H 0.6428 0.2336 0.7164 0.048 Uiso 1 1 calc R . . 
H1C H 0.5836 0.1712 0.7323 0.048 Uiso 1 1 calc R . . 
C7 C 0.4771(2) 0.2251(2) 0.6534(2) 0.0235(11) Uani 1 1 d . . . 
C12 C 0.5227(4) 0.4224(3) 0.4792(4) 0.081(3) Uani 1 1 d . . . 
H12A H 0.5554 0.4242 0.4559 0.121 Uiso 1 1 calc R . . 
H12B H 0.5388 0.4415 0.5161 0.121 Uiso 1 1 calc R . . 
H12C H 0.5049 0.4436 0.4596 0.121 Uiso 1 1 calc R . . 
C16 C 0.3784(4) 0.1519(4) 0.4146(5) 0.095(4) Uani 1 1 d . . . 
H16A H 0.3806 0.1905 0.4232 0.143 Uiso 1 1 calc R . . 
H16B H 0.3504 0.1209 0.4411 0.143 Uiso 1 1 calc R . . 
H16C H 0.3641 0.1399 0.3754 0.143 Uiso 1 1 calc R . . 
C23 C 0.5625(3) 0.0195(2) 0.6685(2) 0.0307(13) Uani 1 1 d . . . 
H23 H 0.5786 -0.0039 0.6836 0.037 Uiso 1 1 calc R . . 
C21 C 0.4762(2) 0.0306(2) 0.6461(2) 0.0261(12) Uani 1 1 d . . . 
H21 H 0.4338 0.0151 0.6462 0.031 Uiso 1 1 calc R . . 
C3 C 0.4706(3) 0.1709(2) 0.7431(3) 0.0300(12) Uani 1 1 d . . . 
H3 H 0.4894 0.1597 0.7717 0.036 Uiso 1 1 calc R . . 
C25 C 0.6718(2) 0.1044(3) 0.6500(3) 0.0312(13) Uani 1 1 d . . . 
H25A H 0.6880 0.1377 0.6783 0.037 Uiso 1 1 calc R . . 
H25B H 0.6787 0.0723 0.6653 0.037 Uiso 1 1 calc R . . 
C24 C 0.6031(2) 0.0788(2) 0.6456(2) 0.0281(12) Uani 1 1 d . . . 
C18 C 0.4365(4) 0.0954(3) 0.4279(3) 0.064(2) Uani 1 1 d . . . 
H18A H 0.4143 0.0702 0.3952 0.096 Uiso 1 1 calc R . . 
H18B H 0.4143 0.0766 0.4630 0.096 Uiso 1 1 calc R . . 
H18C H 0.4766 0.0992 0.4297 0.096 Uiso 1 1 calc R . . 
C10 C 0.3845(3) 0.3070(3) 0.5530(3) 0.0389(15) Uani 1 1 d . . . 
H10A H 0.3555 0.3147 0.5739 0.047 Uiso 1 1 calc R . . 
H10B H 0.3611 0.2716 0.5279 0.047 Uiso 1 1 calc R . . 
C11 C 0.4251(4) 0.3623(4) 0.5159(4) 0.070(2) Uani 1 1 d . . . 
H11A H 0.4002 0.3666 0.4860 0.084 Uiso 1 1 calc R . . 
H11B H 0.4425 0.3990 0.5399 0.084 Uiso 1 1 calc R . . 
C13 C 0.4611(5) 0.3322(4) 0.4305(3) 0.079(3) Uani 1 1 d . . . 
H13A H 0.4340 0.2884 0.4329 0.118 Uiso 1 1 calc R . . 
H13B H 0.4985 0.3406 0.4111 0.118 Uiso 1 1 calc R . . 
H13C H 0.4414 0.3504 0.4090 0.118 Uiso 1 1 calc R . . 
C8 C 0.3694(3) 0.1093(3) 0.7962(3) 0.0525(18) Uani 1 1 d . . . 
H8A H 0.3305 0.1080 0.7984 0.079 Uiso 1 1 calc R . . 
H8B H 0.3913 0.1248 0.8321 0.079 Uiso 1 1 calc R . . 
H8C H 0.3625 0.0685 0.7894 0.079 Uiso 1 1 calc R . . 
Cl1 Cl 0.6667 0.3333 0.37862(12) 0.0426(6) Uani 1 3 d S . . 
O9 O 0.6607(2) 0.2757(2) 0.3996(2) 0.0522(12) Uani 1 1 d . . . 
O10 O 0.6667 0.3333 0.3174(3) 0.0440(18) Uani 1 3 d S . . 
O12 O 0.0939(4) 0.0039(4) 0.4208(4) 0.120(3) Uani 1 1 d U . . 
O11 O 0.7216(7) 0.0000 0.7500 0.200(6) Uani 1 2 d SU . . 
H96 H 0.676(2) 0.268(2) 0.4866(9) 0.016(14) Uiso 1 1 d D . . 
  
loop_ 
 _atom_site_aniso_label 
 _atom_site_aniso_U_11 
 _atom_site_aniso_U_22 
 _atom_site_aniso_U_33 
 _atom_site_aniso_U_23 
 _atom_site_aniso_U_13 
 _atom_site_aniso_U_12 
Dy1 0.01902(16) 0.01838(16) 0.02878(19) -0.00030(10) 0.00029(10) 0.00934(11) 
Ni1 0.0200(3) 0.0213(3) 0.0287(4) -0.0001(3) -0.0027(3) 0.0108(3) 
O5 0.0205(19) 0.0205(19) 0.034(4) 0.000 0.000 0.0102(9) 
O6 0.0231(18) 0.0183(18) 0.024(2) 0.0025(16) 0.0017(16) 0.0101(16) 
O2 0.0252(19) 0.0260(19) 0.032(2) 0.0016(17) -0.0038(17) 0.0143(16) 
O3 0.0229(18) 0.0224(18) 0.032(2) 0.0002(16) 0.0005(16) 0.0092(16) 
O7 0.030(2) 0.0233(19) 0.034(2) -0.0039(17) -0.0043(18) 0.0139(17) 
O4 0.0224(18) 0.0188(17) 0.029(2) 0.0034(16) 0.0058(16) 0.0097(15) 
O1 0.0216(18) 0.0247(18) 0.028(2) 0.0028(16) 0.0024(16) 0.0130(16) 
N2 0.027(2) 0.031(2) 0.031(3) -0.003(2) -0.008(2) 0.019(2) 
O8 0.0237(19) 0.027(2) 0.036(2) -0.0015(17) -0.0048(17) 0.0111(16) 
C20 0.025(3) 0.023(3) 0.024(3) -0.003(2) -0.001(2) 0.011(2) 
C14 0.039(3) 0.018(3) 0.035(3) -0.003(2) -0.005(3) 0.010(2) 
C2 0.025(3) 0.025(3) 0.026(3) -0.003(2) -0.004(2) 0.011(2) 
C26 0.025(3) 0.017(2) 0.029(3) -0.004(2) 0.000(2) 0.009(2) 
C6 0.027(3) 0.024(3) 0.033(3) 0.003(2) 0.003(2) 0.014(2) 
C9 0.021(3) 0.032(3) 0.041(4) 0.001(3) 0.000(3) 0.015(2) 
C5 0.023(3) 0.033(3) 0.039(3) 0.001(3) 0.006(3) 0.013(2) 
N1 0.024(2) 0.028(2) 0.032(3) 0.004(2) 0.003(2) 0.014(2) 
C22 0.029(3) 0.019(3) 0.028(3) -0.003(2) -0.005(2) 0.005(2) 
C27 0.036(3) 0.024(3) 0.036(3) 0.005(3) 0.001(3) 0.005(3) 
C15 0.052(4) 0.033(3) 0.034(4) -0.010(3) -0.021(3) 0.021(3) 
C19 0.024(3) 0.026(3) 0.038(3) -0.003(3) -0.006(2) 0.010(2) 
C4 0.038(3) 0.043(3) 0.023(3) 0.005(3) 0.008(3) 0.021(3) 
C17 0.115(7) 0.050(5) 0.035(4) -0.012(4) -0.016(5) 0.021(5) 
C1 0.037(3) 0.032(3) 0.033(3) 0.004(3) -0.008(3) 0.022(3) 
C7 0.024(3) 0.018(2) 0.029(3) 0.004(2) 0.006(2) 0.011(2) 
C12 0.109(7) 0.038(4) 0.072(6) 0.009(4) -0.053(5) 0.019(4) 
C16 0.082(7) 0.095(7) 0.120(9) -0.066(7) -0.067(6) 0.052(6) 
C23 0.041(3) 0.023(3) 0.028(3) -0.005(2) -0.001(3) 0.017(3) 
C21 0.023(3) 0.019(3) 0.029(3) -0.002(2) 0.006(2) 0.005(2) 
C3 0.036(3) 0.032(3) 0.029(3) 0.002(2) 0.003(3) 0.022(3) 
C25 0.030(3) 0.027(3) 0.039(3) 0.008(3) 0.003(3) 0.016(2) 
C24 0.028(3) 0.026(3) 0.027(3) 0.001(2) 0.005(2) 0.011(2) 
C18 0.097(6) 0.030(3) 0.057(5) -0.014(3) -0.029(4) 0.026(4) 
C10 0.023(3) 0.042(3) 0.052(4) 0.007(3) -0.006(3) 0.017(3) 
C11 0.058(5) 0.103(7) 0.066(5) 0.025(5) 0.002(4) 0.054(5) 
C13 0.159(9) 0.064(5) 0.038(4) -0.007(4) -0.017(5) 0.074(6) 
C8 0.046(4) 0.057(4) 0.043(4) 0.018(3) 0.012(3) 0.018(4) 
Cl1 0.0465(9) 0.0465(9) 0.0349(15) 0.000 0.000 0.0232(5) 
O9 0.069(3) 0.050(3) 0.041(3) 0.006(2) 0.000(2) 0.033(3) 
O10 0.054(3) 0.054(3) 0.023(4) 0.000 0.000 0.0272(14) 
O12 0.128(5) 0.094(4) 0.128(5) 0.008(3) -0.019(4) 0.048(3) 
O11 0.195(7) 0.203(7) 0.205(7) 0.020(4) 0.010(2) 0.101(3) 
  
_geom_special_details 
; 
 All esds (except the esd in the dihedral angle between two l.s. planes) 
 are estimated using the full covariance matrix.  The cell esds are taken 
 into account individually in the estimation of esds in distances, angles 
 and torsion angles; correlations between esds in cell parameters are only 
 used when they are defined by crystal symmetry.  An approximate (isotropic) 
 treatment of cell esds is used for estimating esds involving l.s. planes. 
; 
  
loop_ 
 _geom_bond_atom_site_label_1 
 _geom_bond_atom_site_label_2 
 _geom_bond_distance 
 _geom_bond_site_symmetry_2 
 _geom_bond_publ_flag 
Dy1 O1 2.226(3) . ? 
Dy1 O6 2.284(4) . ? 
Dy1 O4 2.295(3) . ? 
Dy1 O7 2.296(4) . ? 
Dy1 O5 2.415(3) . ? 
Dy1 O6 2.426(3) 3_665 ? 
Dy1 O2 2.614(4) . ? 
Dy1 O3 2.646(3) . ? 
Dy1 Ni1 3.4016(9) . ? 
Dy1 Ni1 3.4503(9) 2_655 ? 
Dy1 Dy1 3.8178(9) 3_665 ? 
Dy1 Dy1 3.8179(8) 2_655 ? 
Ni1 O1 2.019(3) . ? 
Ni1 O4 2.057(3) 3_665 ? 
Ni1 O8 2.086(4) . ? 
Ni1 O6 2.111(4) 3_665 ? 
Ni1 N1 2.118(4) . ? 
Ni1 N2 2.160(4) . ? 
Ni1 Dy1 3.4503(9) 3_665 ? 
O5 Dy1 2.415(3) 2_655 ? 
O5 Dy1 2.415(3) 3_665 ? 
O6 Ni1 2.111(4) 2_655 ? 
O6 Dy1 2.426(3) 2_655 ? 
O2 C2 1.396(6) . ? 
O2 C1 1.443(6) . ? 
O3 C20 1.373(6) . ? 
O3 C19 1.432(6) . ? 
O7 C14 1.280(7) . ? 
O4 C26 1.349(6) . ? 
O4 Ni1 2.057(3) 2_655 ? 
O1 C7 1.331(6) . ? 
N2 C13 1.439(9) . ? 
N2 C11 1.462(9) . ? 
N2 C12 1.463(8) . ? 
O8 C14 1.257(7) . ? 
C20 C21 1.387(7) . ? 
C20 C26 1.402(7) . ? 
C14 C15 1.522(8) . ? 
C2 C3 1.377(8) . ? 
C2 C7 1.403(7) . ? 
C26 C24 1.372(7) . ? 
C6 C5 1.387(8) . ? 
C6 C7 1.397(7) . ? 
C6 C9 1.505(7) . ? 
C9 N1 1.500(7) . ? 
C5 C4 1.383(8) . ? 
N1 C25 1.481(7) 3_665 ? 
N1 C10 1.496(7) . ? 
C22 C23 1.368(8) . ? 
C22 C21 1.379(8) . ? 
C22 C27 1.513(7) . ? 
C15 C17 1.483(11) . ? 
C15 C18 1.530(9) . ? 
C15 C16 1.550(10) . ? 
C4 C3 1.408(8) . ? 
C4 C8 1.525(8) . ? 
C23 C24 1.417(8) . ? 
C25 N1 1.481(7) 2_655 ? 
C25 C24 1.509(7) . ? 
C10 C11 1.507(10) . ? 
Cl1 O10 1.407(7) . ? 
Cl1 O9 1.456(5) 2_655 ? 
Cl1 O9 1.456(4) 3_665 ? 
Cl1 O9 1.457(4) . ? 
  
loop_ 
 _geom_angle_atom_site_label_1 
 _geom_angle_atom_site_label_2 
 _geom_angle_atom_site_label_3 
 _geom_angle 
 _geom_angle_site_symmetry_1 
 _geom_angle_site_symmetry_3 
 _geom_angle_publ_flag 
O1 Dy1 O6 156.69(13) . . ? 
O1 Dy1 O4 130.48(12) . . ? 
O6 Dy1 O4 71.70(12) . . ? 
O1 Dy1 O7 87.43(13) . . ? 
O6 Dy1 O7 93.47(13) . . ? 
O4 Dy1 O7 105.00(13) . . ? 
O1 Dy1 O5 91.88(11) . . ? 
O6 Dy1 O5 74.23(14) . . ? 
O4 Dy1 O5 101.77(10) . . ? 
O7 Dy1 O5 145.18(16) . . ? 
O1 Dy1 O6 70.24(12) . 3_665 ? 
O6 Dy1 O6 87.43(17) . 3_665 ? 
O4 Dy1 O6 159.13(12) . 3_665 ? 
O7 Dy1 O6 75.32(13) . 3_665 ? 
O5 Dy1 O6 71.75(13) . 3_665 ? 
O1 Dy1 O2 62.30(11) . . ? 
O6 Dy1 O2 128.46(12) . . ? 
O4 Dy1 O2 75.84(12) . . ? 
O7 Dy1 O2 133.55(13) . . ? 
O5 Dy1 O2 74.58(16) . . ? 
O6 Dy1 O2 119.55(12) 3_665 . ? 
O1 Dy1 O3 77.93(12) . . ? 
O6 Dy1 O3 124.27(11) . . ? 
O4 Dy1 O3 62.67(11) . . ? 
O7 Dy1 O3 70.59(12) . . ? 
O5 Dy1 O3 143.04(16) . . ? 
O6 Dy1 O3 133.83(11) 3_665 . ? 
O2 Dy1 O3 69.21(11) . . ? 
O1 Dy1 Ni1 34.71(9) . . ? 
O6 Dy1 Ni1 124.85(9) . . ? 
O4 Dy1 Ni1 162.15(8) . . ? 
O7 Dy1 Ni1 69.88(9) . . ? 
O5 Dy1 Ni1 90.31(3) . . ? 
O6 Dy1 Ni1 38.04(8) 3_665 . ? 
O2 Dy1 Ni1 95.13(7) . . ? 
O3 Dy1 Ni1 99.85(8) . . ? 
O1 Dy1 Ni1 165.16(9) . 2_655 ? 
O6 Dy1 Ni1 36.53(9) . 2_655 ? 
O4 Dy1 Ni1 35.21(8) . 2_655 ? 
O7 Dy1 Ni1 100.10(9) . 2_655 ? 
O5 Dy1 Ni1 89.16(3) . 2_655 ? 
O6 Dy1 Ni1 123.92(8) 3_665 2_655 ? 
O2 Dy1 Ni1 103.86(7) . 2_655 ? 
O3 Dy1 Ni1 92.42(8) . 2_655 ? 
Ni1 Dy1 Ni1 160.13(2) . 2_655 ? 
O1 Dy1 Dy1 73.85(9) . 3_665 ? 
O6 Dy1 Dy1 84.00(8) . 3_665 ? 
O4 Dy1 Dy1 138.34(8) . 3_665 ? 
O7 Dy1 Dy1 109.90(9) . 3_665 ? 
O5 Dy1 Dy1 37.76(8) . 3_665 ? 
O6 Dy1 Dy1 34.60(9) 3_665 3_665 ? 
O2 Dy1 Dy1 95.26(8) . 3_665 ? 
O3 Dy1 Dy1 151.69(8) . 3_665 ? 
Ni1 Dy1 Dy1 56.747(13) . 3_665 ? 
Ni1 Dy1 Dy1 114.732(12) 2_655 3_665 ? 
O1 Dy1 Dy1 128.91(9) . 2_655 ? 
O6 Dy1 Dy1 37.11(9) . 2_655 ? 
O4 Dy1 Dy1 81.12(8) . 2_655 ? 
O7 Dy1 Dy1 126.67(10) . 2_655 ? 
O5 Dy1 Dy1 37.76(8) . 2_655 ? 
O6 Dy1 Dy1 82.26(8) 3_665 2_655 ? 
O2 Dy1 Dy1 99.63(8) . 2_655 ? 
O3 Dy1 Dy1 143.59(8) . 2_655 ? 
Ni1 Dy1 Dy1 115.927(13) . 2_655 ? 
Ni1 Dy1 Dy1 55.532(12) 2_655 2_655 ? 
Dy1 Dy1 Dy1 60.0 3_665 2_655 ? 
O1 Ni1 O4 89.13(14) . 3_665 ? 
O1 Ni1 O8 89.62(14) . . ? 
O4 Ni1 O8 171.69(14) 3_665 . ? 
O1 Ni1 O6 80.94(14) . 3_665 ? 
O4 Ni1 O6 80.06(14) 3_665 3_665 ? 
O8 Ni1 O6 91.63(14) . 3_665 ? 
O1 Ni1 N1 88.55(15) . . ? 
O4 Ni1 N1 91.57(16) 3_665 . ? 
O8 Ni1 N1 96.61(16) . . ? 
O6 Ni1 N1 166.60(17) 3_665 . ? 
O1 Ni1 N2 173.33(16) . . ? 
O4 Ni1 N2 94.41(16) 3_665 . ? 
O8 Ni1 N2 87.68(16) . . ? 
O6 Ni1 N2 105.23(16) 3_665 . ? 
N1 Ni1 N2 85.71(17) . . ? 
O1 Ni1 Dy1 38.90(10) . . ? 
O4 Ni1 Dy1 95.48(9) 3_665 . ? 
O8 Ni1 Dy1 78.47(10) . . ? 
O6 Ni1 Dy1 45.08(10) 3_665 . ? 
N1 Ni1 Dy1 126.55(12) . . ? 
N2 Ni1 Dy1 145.82(13) . . ? 
O1 Ni1 Dy1 85.15(10) . 3_665 ? 
O4 Ni1 Dy1 40.04(9) 3_665 3_665 ? 
O8 Ni1 Dy1 131.65(10) . 3_665 ? 
O6 Ni1 Dy1 40.08(10) 3_665 3_665 ? 
N1 Ni1 Dy1 131.13(13) . 3_665 ? 
N2 Ni1 Dy1 101.19(12) . 3_665 ? 
Dy1 Ni1 Dy1 67.720(14) . 3_665 ? 
Dy1 O5 Dy1 104.48(16) 2_655 3_665 ? 
Dy1 O5 Dy1 104.48(16) 2_655 . ? 
Dy1 O5 Dy1 104.48(16) 3_665 . ? 
Ni1 O6 Dy1 103.38(15) 2_655 . ? 
Ni1 O6 Dy1 96.88(14) 2_655 2_655 ? 
Dy1 O6 Dy1 108.28(15) . 2_655 ? 
C2 O2 C1 117.7(4) . . ? 
C2 O2 Dy1 110.2(3) . . ? 
C1 O2 Dy1 127.6(3) . . ? 
C20 O3 C19 115.7(4) . . ? 
C20 O3 Dy1 116.1(3) . . ? 
C19 O3 Dy1 128.2(3) . . ? 
C14 O7 Dy1 133.0(4) . . ? 
C26 O4 Ni1 123.1(3) . 2_655 ? 
C26 O4 Dy1 127.8(3) . . ? 
Ni1 O4 Dy1 104.75(14) 2_655 . ? 
C7 O1 Ni1 128.6(3) . . ? 
C7 O1 Dy1 123.2(3) . . ? 
Ni1 O1 Dy1 106.39(15) . . ? 
C13 N2 C11 113.9(6) . . ? 
C13 N2 C12 104.3(6) . . ? 
C11 N2 C12 103.3(7) . . ? 
C13 N2 Ni1 115.1(4) . . ? 
C11 N2 Ni1 105.2(4) . . ? 
C12 N2 Ni1 114.6(4) . . ? 
C14 O8 Ni1 130.1(4) . . ? 
O3 C20 C21 125.8(5) . . ? 
O3 C20 C26 113.7(4) . . ? 
C21 C20 C26 120.5(5) . . ? 
O8 C14 O7 124.4(5) . . ? 
O8 C14 C15 118.2(5) . . ? 
O7 C14 C15 117.5(5) . . ? 
C3 C2 O2 126.1(5) . . ? 
C3 C2 C7 121.8(5) . . ? 
O2 C2 C7 112.0(5) . . ? 
O4 C26 C24 122.7(4) . . ? 
O4 C26 C20 117.9(5) . . ? 
C24 C26 C20 119.4(5) . . ? 
C5 C6 C7 118.2(5) . . ? 
C5 C6 C9 120.5(5) . . ? 
C7 C6 C9 121.3(5) . . ? 
N1 C9 C6 112.6(4) . . ? 
C4 C5 C6 122.6(5) . . ? 
C25 N1 C10 111.7(4) 3_665 . ? 
C25 N1 C9 107.8(4) 3_665 . ? 
C10 N1 C9 109.5(4) . . ? 
C25 N1 Ni1 114.3(3) 3_665 . ? 
C10 N1 Ni1 104.2(3) . . ? 
C9 N1 Ni1 109.3(3) . . ? 
C23 C22 C21 119.3(5) . . ? 
C23 C22 C27 119.4(5) . . ? 
C21 C22 C27 121.3(5) . . ? 
C17 C15 C14 108.4(5) . . ? 
C17 C15 C18 107.8(6) . . ? 
C14 C15 C18 110.1(5) . . ? 
C17 C15 C16 111.1(7) . . ? 
C14 C15 C16 110.6(6) . . ? 
C18 C15 C16 108.8(6) . . ? 
C5 C4 C3 119.1(5) . . ? 
C5 C4 C8 122.0(5) . . ? 
C3 C4 C8 118.9(5) . . ? 
O1 C7 C6 123.8(5) . . ? 
O1 C7 C2 116.6(4) . . ? 
C6 C7 C2 119.5(5) . . ? 
C22 C23 C24 121.3(5) . . ? 
C22 C21 C20 120.4(5) . . ? 
C2 C3 C4 118.7(5) . . ? 
N1 C25 C24 117.0(5) 2_655 . ? 
C26 C24 C23 119.1(5) . . ? 
C26 C24 C25 121.5(5) . . ? 
C23 C24 C25 119.3(5) . . ? 
N1 C10 C11 112.9(5) . . ? 
N2 C11 C10 112.8(6) . . ? 
O10 Cl1 O9 109.3(2) . 2_655 ? 
O10 Cl1 O9 109.3(2) . 3_665 ? 
O9 Cl1 O9 109.6(2) 2_655 3_665 ? 
O10 Cl1 O9 109.3(2) . . ? 
O9 Cl1 O9 109.6(2) 2_655 . ? 
O9 Cl1 O9 109.6(2) 3_665 . ? 
  
_diffrn_measured_fraction_theta_max    1.000 
_diffrn_reflns_theta_full              25.50 
_diffrn_measured_fraction_theta_full   1.000 
_refine_diff_density_max    2.933 
_refine_diff_density_min   -0.822 
_refine_diff_density_rms    0.161 

loop_
  _platon_squeeze_void_nr
  _platon_squeeze_void_average_x
  _platon_squeeze_void_average_y
  _platon_squeeze_void_average_z
  _platon_squeeze_void_volume
  _platon_squeeze_void_count_electrons
  _platon_squeeze_void_content
   1  0.000  0.000  0.000        12         5 ' '
   2  0.000  0.000 -0.023      3666       613 ' '
   3  0.000  0.000  0.500        12         5 ' '
_platon_squeeze_details
;
;


#===========#


  
data_Compound_2 
  
_audit_creation_method            SHELXL-97 
_chemical_name_systematic 
; 
 ? 
; 
_chemical_name_common             ? 
_chemical_melting_point           ? 
_chemical_formula_moiety          'C162 H240 Cl2 N12 Ni6 O55 Tb6' 
_chemical_formula_sum 
 'C162 H240 Cl2 N12 Ni6 O55 Tb6' 
_chemical_formula_weight          4612.28 
  
loop_ 
 _atom_type_symbol 
 _atom_type_description 
 _atom_type_scat_dispersion_real 
 _atom_type_scat_dispersion_imag 
 _atom_type_scat_source 
 'C'  'C'   0.0033   0.0016 
 'International Tables Vol C Tables 4.2.6.8 and 6.1.1.4' 
 'H'  'H'   0.0000   0.0000 
 'International Tables Vol C Tables 4.2.6.8 and 6.1.1.4' 
 'N'  'N'   0.0061   0.0033 
 'International Tables Vol C Tables 4.2.6.8 and 6.1.1.4' 
 'O'  'O'   0.0106   0.0060 
 'International Tables Vol C Tables 4.2.6.8 and 6.1.1.4' 
 'Cl'  'Cl'   0.1484   0.1585 
 'International Tables Vol C Tables 4.2.6.8 and 6.1.1.4' 
 'Ni'  'Ni'   0.3393   1.1124 
 'International Tables Vol C Tables 4.2.6.8 and 6.1.1.4' 
 'Tb'  'Tb'  -0.1723   4.1537 
 'International Tables Vol C Tables 4.2.6.8 and 6.1.1.4' 
  
_symmetry_cell_setting            Trigonal 
_symmetry_space_group_name_H-M    P-3c1 
  
loop_ 
 _symmetry_equiv_pos_as_xyz 
 'x, y, z' 
 '-y, x-y, z' 
 '-x+y, -x, z' 
 'x-y, -y, -z+1/2' 
 '-x, -x+y, -z+1/2' 
 'y, x, -z+1/2' 
 '-x, -y, -z' 
 'y, -x+y, -z' 
 'x-y, x, -z' 
 '-x+y, y, z-1/2' 
 'x, x-y, z-1/2' 
 '-y, -x, z-1/2' 
  
_cell_length_a                    25.180(5) 
_cell_length_b                    25.180(5) 
_cell_length_c                    22.779(5) 
_cell_angle_alpha                 90.000(5) 
_cell_angle_beta                  90.000(5) 
_cell_angle_gamma                 120.000(5) 
_cell_volume                      12508(4) 
_cell_formula_units_Z             2 
_cell_measurement_temperature     100(2) 
_cell_measurement_reflns_used     9906 
_cell_measurement_theta_min       2.41 
_cell_measurement_theta_max       28.37 
  
_exptl_crystal_description        block 
_exptl_crystal_colour             green 
_exptl_crystal_size_max           0.22 
_exptl_crystal_size_mid           0.20 
_exptl_crystal_size_min           0.18 
_exptl_crystal_density_meas       ? 
_exptl_crystal_density_diffrn     1.225 
_exptl_crystal_density_method     'not measured' 
_exptl_crystal_F_000              4656 
_exptl_absorpt_coefficient_mu     2.194 
_exptl_absorpt_correction_type    empirical 
_exptl_absorpt_correction_T_min   0.6611 
_exptl_absorpt_correction_T_max   1.00 
_exptl_absorpt_process_details    sadabs 
  
_exptl_special_details 
; 
 ? 
; 
  
_diffrn_ambient_temperature       100(2) 
_diffrn_radiation_wavelength      0.71069 
_diffrn_radiation_type            MoK\a 
_diffrn_radiation_source          'fine-focus sealed tube' 
_diffrn_radiation_monochromator   graphite 
_diffrn_measurement_device_type   'CCD area detector' 
_diffrn_measurement_method        'phi and omega scans' 
_diffrn_detector_area_resol_mean  ? 
_diffrn_standards_number          ? 
_diffrn_standards_interval_count  ? 
_diffrn_standards_interval_time   ? 
_diffrn_standards_decay_%         ? 
_diffrn_reflns_number             88168 
_diffrn_reflns_av_R_equivalents   0.0499 
_diffrn_reflns_av_sigmaI/netI     0.0243 
_diffrn_reflns_limit_h_min        -25 
_diffrn_reflns_limit_h_max        30 
_diffrn_reflns_limit_k_min        -30 
_diffrn_reflns_limit_k_max        30 
_diffrn_reflns_limit_l_min        -27 
_diffrn_reflns_limit_l_max        27 
_diffrn_reflns_theta_min          2.41 
_diffrn_reflns_theta_max          25.50 
_reflns_number_total              7774 
_reflns_number_gt                 6818 
_reflns_threshold_expression      >2sigma(I) 
  
_computing_data_collection        'Bruker SMART' 
_computing_cell_refinement        'Bruker SMART' 
_computing_data_reduction         'Bruker SAINT' 
_computing_structure_solution     'SHELXS-97 (Sheldrick, 1990)' 
_computing_structure_refinement   'SHELXL-97 (Sheldrick, 1997)' 
_computing_molecular_graphics     'Bruker SHELXTL' 
_computing_publication_material   'Bruker SHELXTL' 
  
_refine_special_details 
; 
 Refinement of F^2^ against ALL reflections.  The weighted R-factor wR and 
 goodness of fit S are based on F^2^, conventional R-factors R are based 
 on F, with F set to zero for negative F^2^. The threshold expression of 
 F^2^ > 2sigma(F^2^) is used only for calculating R-factors(gt) etc. and is 
 not relevant to the choice of reflections for refinement.  R-factors based 
 on F^2^ are statistically about twice as large as those based on F, and R- 
 factors based on ALL data will be even larger. 
; 
  
_refine_ls_structure_factor_coef  Fsqd 
_refine_ls_matrix_type            full 
_refine_ls_weighting_scheme       calc 
_refine_ls_weighting_details 
 'calc w=1/[\s^2^(Fo^2^)+(0.0492P)^2^+44.1814P] where P=(Fo^2^+2Fc^2^)/3' 
_atom_sites_solution_primary      direct 
_atom_sites_solution_secondary    difmap 
_atom_sites_solution_hydrogens    geom 
_refine_ls_hydrogen_treatment     mixed 
_refine_ls_extinction_method      none 
_refine_ls_extinction_coef        ? 
_refine_ls_number_reflns          7774 
_refine_ls_number_parameters      379 
_refine_ls_number_restraints      13 
_refine_ls_R_factor_all           0.0461 
_refine_ls_R_factor_gt            0.0364 
_refine_ls_wR_factor_ref          0.0954 
_refine_ls_wR_factor_gt           0.0913 
_refine_ls_goodness_of_fit_ref    1.031 
_refine_ls_restrained_S_all       1.031 
_refine_ls_shift/su_max           0.019 
_refine_ls_shift/su_mean          0.000 
  
loop_ 
 _atom_site_label 
 _atom_site_type_symbol 
 _atom_site_fract_x 
 _atom_site_fract_y 
 _atom_site_fract_z 
 _atom_site_U_iso_or_equiv 
 _atom_site_adp_type 
 _atom_site_occupancy 
 _atom_site_symmetry_multiplicity 
 _atom_site_calc_flag 
 _atom_site_refinement_flags 
 _atom_site_disorder_assembly 
 _atom_site_disorder_group 
Tb1 Tb 0.585871(9) 0.239636(9) 0.426599(9) 0.01596(8) Uani 1 1 d . . . 
Ni1 Ni 0.50061(2) 0.30848(2) 0.45001(2) 0.01682(13) Uani 1 1 d . . . 
Cl1 Cl 0.6667 0.3333 0.62218(8) 0.0311(4) Uani 1 3 d S . . 
O1 O 0.56495(13) 0.22602(13) 0.31277(12) 0.0195(6) Uani 1 1 d . . . 
O2 O 0.51288(12) 0.25677(13) 0.39063(11) 0.0170(6) Uani 1 1 d . . . 
O3 O 0.55475(13) 0.38465(13) 0.39992(12) 0.0188(6) Uani 1 1 d . . . 
O4 O 0.62930(13) 0.50263(13) 0.40157(13) 0.0204(6) Uani 1 1 d . . . 
O5 O 0.6667 0.3333 0.3838(2) 0.0182(10) Uani 1 3 d S . . 
O6 O 0.67405(13) 0.26197(13) 0.47678(13) 0.0173(6) Uani 1 1 d DU . . 
O7 O 0.52356(14) 0.19798(13) 0.50715(13) 0.0232(7) Uani 1 1 d . . . 
O8 O 0.45716(13) 0.23246(13) 0.50531(13) 0.0231(6) Uani 1 1 d . . . 
O9 O 0.61591(17) 0.33921(18) 0.60103(15) 0.0421(9) Uani 1 1 d . . . 
O10 O 0.6667 0.3333 0.6848(2) 0.0351(14) Uani 1 3 d S . . 
N1 N 0.42138(16) 0.29205(16) 0.40392(15) 0.0210(8) Uani 1 1 d . . . 
N2 N 0.47608(16) 0.35771(17) 0.51181(15) 0.0227(8) Uani 1 1 d . . . 
C1 C 0.5985(2) 0.2135(2) 0.26956(19) 0.0250(10) Uani 1 1 d . . . 
H1A H 0.5808 0.1699 0.2652 0.037 Uiso 1 1 calc R . . 
H1B H 0.6405 0.2311 0.2818 0.037 Uiso 1 1 calc R . . 
H1C H 0.5969 0.2310 0.2327 0.037 Uiso 1 1 calc R . . 
C2 C 0.50366(19) 0.20647(19) 0.30179(18) 0.0201(9) Uani 1 1 d . . . 
C3 C 0.4695(2) 0.1699(2) 0.25572(18) 0.0244(10) Uani 1 1 d . . . 
H3 H 0.4879 0.1582 0.2270 0.029 Uiso 1 1 calc R . . 
C4 C 0.4071(2) 0.1504(2) 0.2525(2) 0.0286(10) Uani 1 1 d . . . 
C5 C 0.3680(3) 0.1072(3) 0.2040(2) 0.0452(14) Uani 1 1 d . . . 
H5A H 0.3597 0.0664 0.2127 0.068 Uiso 1 1 calc R . . 
H5B H 0.3895 0.1204 0.1673 0.068 Uiso 1 1 calc R . . 
H5C H 0.3300 0.1074 0.2013 0.068 Uiso 1 1 calc R . . 
C6 C 0.3814(2) 0.1706(2) 0.2946(2) 0.0269(10) Uani 1 1 d . . . 
H6 H 0.3402 0.1590 0.2916 0.032 Uiso 1 1 calc R . . 
C7 C 0.41542(19) 0.20753(19) 0.34116(18) 0.0208(9) Uani 1 1 d . . . 
C8 C 0.47695(19) 0.22471(18) 0.34561(18) 0.0195(9) Uani 1 1 d . . . 
C9 C 0.38516(19) 0.2256(2) 0.3883(2) 0.0246(10) Uani 1 1 d . . . 
H9A H 0.3448 0.2162 0.3748 0.030 Uiso 1 1 calc R . . 
H9B H 0.3797 0.2013 0.4232 0.030 Uiso 1 1 calc R . . 
C10 C 0.4338(2) 0.3278(2) 0.34871(19) 0.0244(9) Uani 1 1 d . . . 
H10A H 0.3949 0.3201 0.3327 0.029 Uiso 1 1 calc R . . 
H10B H 0.4515 0.3120 0.3207 0.029 Uiso 1 1 calc R . . 
C11 C 0.4756(2) 0.3963(2) 0.35321(18) 0.0215(9) Uani 1 1 d . . . 
C12 C 0.4568(2) 0.4360(2) 0.33106(19) 0.0240(10) Uani 1 1 d . . . 
H12 H 0.4175 0.4196 0.3157 0.029 Uiso 1 1 calc R . . 
C13 C 0.4948(2) 0.4989(2) 0.33129(18) 0.0229(9) Uani 1 1 d . . . 
C14 C 0.4734(2) 0.5402(2) 0.3065(2) 0.0306(11) Uani 1 1 d . . . 
H14A H 0.4341 0.5159 0.2883 0.046 Uiso 1 1 calc R . . 
H14B H 0.5024 0.5671 0.2779 0.046 Uiso 1 1 calc R . . 
H14C H 0.4701 0.5642 0.3376 0.046 Uiso 1 1 calc R . . 
C15 C 0.5537(2) 0.5227(2) 0.35423(18) 0.0224(9) Uani 1 1 d . . . 
H15 H 0.5802 0.5649 0.3547 0.027 Uiso 1 1 calc R . . 
C16 C 0.57287(19) 0.48377(19) 0.37634(17) 0.0181(9) Uani 1 1 d . . . 
C17 C 0.53420(19) 0.42020(19) 0.37622(17) 0.0186(9) Uani 1 1 d . . . 
C18 C 0.6683(2) 0.56750(19) 0.4090(2) 0.0259(10) Uani 1 1 d . . . 
H18A H 0.6785 0.5871 0.3713 0.039 Uiso 1 1 calc R . . 
H18B H 0.7052 0.5754 0.4289 0.039 Uiso 1 1 calc R . . 
H18C H 0.6474 0.5834 0.4319 0.039 Uiso 1 1 calc R . . 
C19 C 0.3860(2) 0.3073(2) 0.4463(2) 0.0314(11) Uani 1 1 d . . . 
H19A H 0.3574 0.3152 0.4246 0.038 Uiso 1 1 calc R . . 
H19B H 0.3622 0.2722 0.4715 0.038 Uiso 1 1 calc R . . 
C20 C 0.4255(3) 0.3615(4) 0.4833(3) 0.0625(19) Uani 1 1 d . . . 
H20A H 0.4425 0.3981 0.4592 0.075 Uiso 1 1 calc R . . 
H20B H 0.4004 0.3655 0.5134 0.075 Uiso 1 1 calc R . . 
C21 C 0.4607(4) 0.3310(3) 0.5694(2) 0.077(3) Uani 1 1 d . . . 
H21A H 0.4963 0.3330 0.5871 0.115 Uiso 1 1 calc R . . 
H21B H 0.4287 0.2889 0.5664 0.115 Uiso 1 1 calc R . . 
H21C H 0.4469 0.3532 0.5932 0.115 Uiso 1 1 calc R . . 
C22 C 0.5241(3) 0.4215(3) 0.5220(3) 0.065(2) Uani 1 1 d . . . 
H22A H 0.5075 0.4421 0.5446 0.098 Uiso 1 1 calc R . . 
H22B H 0.5387 0.4420 0.4850 0.098 Uiso 1 1 calc R . . 
H22C H 0.5574 0.4222 0.5431 0.098 Uiso 1 1 calc R . . 
C23 C 0.4773(2) 0.19980(19) 0.5263(2) 0.0257(10) Uani 1 1 d . . . 
C24 C 0.4442(3) 0.1596(2) 0.5800(2) 0.0361(12) Uani 1 1 d . . . 
C25 C 0.3808(4) 0.1536(4) 0.5877(4) 0.094(3) Uani 1 1 d . . . 
H25A H 0.3548 0.1306 0.5555 0.142 Uiso 1 1 calc R . . 
H25B H 0.3851 0.1937 0.5884 0.142 Uiso 1 1 calc R . . 
H25C H 0.3628 0.1328 0.6238 0.142 Uiso 1 1 calc R . . 
C26 C 0.4357(3) 0.0961(2) 0.5725(3) 0.0516(16) Uani 1 1 d . . . 
H26A H 0.4751 0.0990 0.5688 0.077 Uiso 1 1 calc R . . 
H26B H 0.4119 0.0774 0.5378 0.077 Uiso 1 1 calc R . . 
H26C H 0.4147 0.0715 0.6061 0.077 Uiso 1 1 calc R . . 
C27 C 0.4842(4) 0.1901(3) 0.6326(2) 0.074(2) Uani 1 1 d . . . 
H27A H 0.4642 0.1672 0.6673 0.111 Uiso 1 1 calc R . . 
H27B H 0.4913 0.2311 0.6362 0.111 Uiso 1 1 calc R . . 
H27C H 0.5227 0.1914 0.6278 0.111 Uiso 1 1 calc R . . 
H111 H 0.676(2) 0.270(2) 0.5127(10) 0.025(13) Uiso 1 1 d D . . 
O25 O 0.2808(4) 0.2808(4) 0.2500 0.186(7) Uani 1 2 d SU . . 
  
loop_ 
 _atom_site_aniso_label 
 _atom_site_aniso_U_11 
 _atom_site_aniso_U_22 
 _atom_site_aniso_U_33 
 _atom_site_aniso_U_23 
 _atom_site_aniso_U_13 
 _atom_site_aniso_U_12 
Tb1 0.01333(11) 0.01234(11) 0.02212(12) 0.00004(7) -0.00047(7) 0.00634(8) 
Ni1 0.0143(3) 0.0158(3) 0.0213(3) 0.0005(2) 0.0022(2) 0.0082(2) 
Cl1 0.0365(7) 0.0365(7) 0.0205(9) 0.000 0.000 0.0182(3) 
O1 0.0194(15) 0.0190(15) 0.0214(15) -0.0015(12) 0.0013(12) 0.0106(12) 
O2 0.0154(14) 0.0177(14) 0.0198(14) -0.0037(12) -0.0028(11) 0.0098(12) 
O3 0.0182(15) 0.0200(15) 0.0234(15) 0.0028(12) 0.0016(12) 0.0134(13) 
O4 0.0187(15) 0.0157(14) 0.0280(16) 0.0007(12) 0.0030(12) 0.0097(12) 
O5 0.0147(15) 0.0147(15) 0.025(3) 0.000 0.000 0.0074(7) 
O6 0.0168(14) 0.0153(14) 0.0195(16) -0.0016(12) -0.0010(12) 0.0078(12) 
O7 0.0249(17) 0.0193(15) 0.0250(16) 0.0033(12) 0.0037(13) 0.0108(13) 
O8 0.0217(16) 0.0184(15) 0.0286(16) 0.0035(13) 0.0059(13) 0.0096(13) 
O9 0.046(2) 0.056(2) 0.0298(19) -0.0008(17) -0.0069(16) 0.029(2) 
O10 0.041(2) 0.041(2) 0.024(3) 0.000 0.000 0.0204(11) 
N1 0.0170(18) 0.0201(19) 0.0262(19) 0.0012(15) 0.0028(15) 0.0096(15) 
N2 0.0220(19) 0.025(2) 0.0237(19) 0.0021(15) 0.0072(15) 0.0138(16) 
C1 0.028(2) 0.024(2) 0.024(2) -0.0016(18) 0.0055(19) 0.015(2) 
C2 0.023(2) 0.017(2) 0.022(2) 0.0049(17) 0.0026(17) 0.0111(18) 
C3 0.034(3) 0.024(2) 0.017(2) -0.0018(17) -0.0017(18) 0.016(2) 
C4 0.031(3) 0.029(3) 0.023(2) -0.0035(19) -0.008(2) 0.013(2) 
C5 0.041(3) 0.056(4) 0.035(3) -0.015(3) -0.013(2) 0.022(3) 
C6 0.022(2) 0.027(2) 0.030(3) 0.0002(19) -0.0073(19) 0.011(2) 
C7 0.020(2) 0.018(2) 0.027(2) 0.0014(18) -0.0009(18) 0.0112(18) 
C8 0.023(2) 0.015(2) 0.021(2) 0.0017(16) 0.0013(17) 0.0100(18) 
C9 0.015(2) 0.024(2) 0.031(2) 0.0003(19) -0.0017(18) 0.0066(19) 
C10 0.021(2) 0.028(2) 0.028(2) -0.0018(19) -0.0067(18) 0.014(2) 
C11 0.021(2) 0.025(2) 0.022(2) 0.0019(18) 0.0024(17) 0.0143(19) 
C12 0.026(2) 0.035(3) 0.021(2) -0.0002(19) 0.0009(18) 0.023(2) 
C13 0.035(3) 0.031(2) 0.016(2) 0.0004(18) 0.0018(18) 0.026(2) 
C14 0.042(3) 0.037(3) 0.025(2) 0.001(2) -0.004(2) 0.029(2) 
C15 0.034(3) 0.021(2) 0.019(2) 0.0021(17) 0.0056(18) 0.018(2) 
C16 0.019(2) 0.025(2) 0.015(2) -0.0007(16) 0.0051(16) 0.0152(19) 
C17 0.024(2) 0.022(2) 0.016(2) 0.0024(16) 0.0054(17) 0.0161(19) 
C18 0.026(2) 0.015(2) 0.038(3) -0.0034(19) 0.001(2) 0.0115(19) 
C19 0.019(2) 0.035(3) 0.041(3) -0.005(2) 0.002(2) 0.015(2) 
C20 0.049(4) 0.095(5) 0.060(4) -0.017(4) 0.002(3) 0.049(4) 
C21 0.171(9) 0.066(5) 0.028(3) 0.007(3) 0.022(4) 0.086(6) 
C22 0.088(5) 0.031(3) 0.061(4) -0.005(3) 0.041(4) 0.018(3) 
C23 0.027(2) 0.016(2) 0.027(2) -0.0009(18) 0.0033(19) 0.0062(19) 
C24 0.047(3) 0.027(3) 0.034(3) 0.015(2) 0.021(2) 0.018(2) 
C25 0.081(6) 0.093(6) 0.128(7) 0.087(6) 0.081(5) 0.058(5) 
C26 0.078(4) 0.027(3) 0.047(3) 0.018(2) 0.025(3) 0.023(3) 
C27 0.116(6) 0.043(4) 0.025(3) 0.012(3) 0.016(3) 0.012(4) 
O25 0.140(6) 0.140(6) 0.237(13) 0.094(6) -0.094(6) 0.040(8) 
  
_geom_special_details 
; 
 All esds (except the esd in the dihedral angle between two l.s. planes) 
 are estimated using the full covariance matrix.  The cell esds are taken 
 into account individually in the estimation of esds in distances, angles 
 and torsion angles; correlations between esds in cell parameters are only 
 used when they are defined by crystal symmetry.  An approximate (isotropic) 
 treatment of cell esds is used for estimating esds involving l.s. planes. 
; 
  
loop_ 
 _geom_bond_atom_site_label_1 
 _geom_bond_atom_site_label_2 
 _geom_bond_distance 
 _geom_bond_site_symmetry_2 
 _geom_bond_publ_flag 
Tb1 O2 2.243(3) . ? 
Tb1 O7 2.299(3) . ? 
Tb1 O3 2.299(3) 2_655 ? 
Tb1 O6 2.303(3) . ? 
Tb1 O5 2.420(2) . ? 
Tb1 O6 2.433(3) 3_665 ? 
Tb1 O1 2.634(3) . ? 
Tb1 O4 2.654(3) 2_655 ? 
Tb1 Ni1 3.4090(8) . ? 
Tb1 Ni1 3.4604(9) 2_655 ? 
Tb1 Tb1 3.8361(8) 2_655 ? 
Tb1 Tb1 3.8362(8) 3_665 ? 
Ni1 O2 2.006(3) . ? 
Ni1 O3 2.055(3) . ? 
Ni1 O8 2.087(3) . ? 
Ni1 N1 2.104(4) . ? 
Ni1 O6 2.105(3) 3_665 ? 
Ni1 N2 2.160(4) . ? 
Ni1 Tb1 3.4604(9) 3_665 ? 
Cl1 O10 1.426(6) . ? 
Cl1 O9 1.441(4) 3_665 ? 
Cl1 O9 1.441(4) . ? 
Cl1 O9 1.441(4) 2_655 ? 
O1 C2 1.388(5) . ? 
O1 C1 1.432(5) . ? 
O2 C8 1.339(5) . ? 
O3 C17 1.351(5) . ? 
O3 Tb1 2.299(3) 3_665 ? 
O4 C16 1.378(5) . ? 
O4 C18 1.434(5) . ? 
O4 Tb1 2.654(3) 3_665 ? 
O5 Tb1 2.420(2) 2_655 ? 
O5 Tb1 2.420(2) 3_665 ? 
O6 Ni1 2.105(3) 2_655 ? 
O6 Tb1 2.433(3) 2_655 ? 
O7 C23 1.267(5) . ? 
O8 C23 1.256(5) . ? 
N1 C10 1.486(6) . ? 
N1 C19 1.488(6) . ? 
N1 C9 1.495(5) . ? 
N2 C21 1.436(7) . ? 
N2 C22 1.468(7) . ? 
N2 C20 1.475(7) . ? 
C2 C3 1.378(6) . ? 
C2 C8 1.403(6) . ? 
C3 C4 1.395(7) . ? 
C4 C6 1.388(7) . ? 
C4 C5 1.516(6) . ? 
C6 C7 1.388(6) . ? 
C7 C8 1.388(6) . ? 
C7 C9 1.512(6) . ? 
C10 C11 1.509(6) . ? 
C11 C17 1.387(6) . ? 
C11 C12 1.398(6) . ? 
C12 C13 1.382(7) . ? 
C13 C15 1.393(6) . ? 
C13 C14 1.501(6) . ? 
C15 C16 1.386(6) . ? 
C16 C17 1.397(6) . ? 
C19 C20 1.486(8) . ? 
C23 C24 1.539(6) . ? 
C24 C27 1.506(9) . ? 
C24 C26 1.514(7) . ? 
C24 C25 1.538(9) . ? 
  
loop_ 
 _geom_angle_atom_site_label_1 
 _geom_angle_atom_site_label_2 
 _geom_angle_atom_site_label_3 
 _geom_angle 
 _geom_angle_site_symmetry_1 
 _geom_angle_site_symmetry_3 
 _geom_angle_publ_flag 
O2 Tb1 O7 86.63(10) . . ? 
O2 Tb1 O3 131.13(10) . 2_655 ? 
O7 Tb1 O3 105.68(10) . 2_655 ? 
O2 Tb1 O6 156.52(10) . . ? 
O7 Tb1 O6 94.01(10) . . ? 
O3 Tb1 O6 71.23(10) 2_655 . ? 
O2 Tb1 O5 92.04(8) . . ? 
O7 Tb1 O5 144.67(12) . . ? 
O3 Tb1 O5 101.64(8) 2_655 . ? 
O6 Tb1 O5 73.97(10) . . ? 
O2 Tb1 O6 69.70(9) . 3_665 ? 
O7 Tb1 O6 74.78(10) . 3_665 ? 
O3 Tb1 O6 159.01(10) 2_655 3_665 ? 
O6 Tb1 O6 87.79(13) . 3_665 ? 
O5 Tb1 O6 71.72(10) . 3_665 ? 
O2 Tb1 O1 62.33(9) . . ? 
O7 Tb1 O1 132.84(10) . . ? 
O3 Tb1 O1 76.13(9) 2_655 . ? 
O6 Tb1 O1 128.76(9) . . ? 
O5 Tb1 O1 75.30(12) . . ? 
O6 Tb1 O1 119.49(9) 3_665 . ? 
O2 Tb1 O4 78.35(9) . 2_655 ? 
O7 Tb1 O4 70.53(10) . 2_655 ? 
O3 Tb1 O4 62.92(9) 2_655 2_655 ? 
O6 Tb1 O4 123.97(9) . 2_655 ? 
O5 Tb1 O4 143.56(12) . 2_655 ? 
O6 Tb1 O4 133.61(9) 3_665 2_655 ? 
O1 Tb1 O4 69.08(9) . 2_655 ? 
O2 Tb1 Ni1 34.32(7) . . ? 
O7 Tb1 Ni1 69.35(7) . . ? 
O3 Tb1 Ni1 162.54(7) 2_655 . ? 
O6 Tb1 Ni1 125.00(7) . . ? 
O5 Tb1 Ni1 90.20(2) . . ? 
O6 Tb1 Ni1 37.80(7) 3_665 . ? 
O1 Tb1 Ni1 94.84(6) . . ? 
O4 Tb1 Ni1 100.01(6) 2_655 . ? 
O2 Tb1 Ni1 165.59(7) . 2_655 ? 
O7 Tb1 Ni1 100.75(8) . 2_655 ? 
O3 Tb1 Ni1 34.98(7) 2_655 2_655 ? 
O6 Tb1 Ni1 36.30(7) . 2_655 ? 
O5 Tb1 Ni1 88.98(2) . 2_655 ? 
O6 Tb1 Ni1 124.04(7) 3_665 2_655 ? 
O1 Tb1 Ni1 104.18(6) . 2_655 ? 
O4 Tb1 Ni1 92.36(6) 2_655 2_655 ? 
Ni1 Tb1 Ni1 160.086(19) . 2_655 ? 
O2 Tb1 Tb1 128.87(7) . 2_655 ? 
O7 Tb1 Tb1 126.94(8) . 2_655 ? 
O3 Tb1 Tb1 80.78(7) 2_655 2_655 ? 
O6 Tb1 Tb1 37.07(7) . 2_655 ? 
O5 Tb1 Tb1 37.56(6) . 2_655 ? 
O6 Tb1 Tb1 82.51(7) 3_665 2_655 ? 
O1 Tb1 Tb1 100.11(6) . 2_655 ? 
O4 Tb1 Tb1 143.52(6) 2_655 2_655 ? 
Ni1 Tb1 Tb1 115.873(10) . 2_655 ? 
Ni1 Tb1 Tb1 55.418(10) 2_655 2_655 ? 
O2 Tb1 Tb1 73.64(7) . 3_665 ? 
O7 Tb1 Tb1 109.53(7) . 3_665 ? 
O3 Tb1 Tb1 138.03(7) 2_655 3_665 ? 
O6 Tb1 Tb1 84.10(7) . 3_665 ? 
O5 Tb1 Tb1 37.56(6) . 3_665 ? 
O6 Tb1 Tb1 34.78(7) 3_665 3_665 ? 
O1 Tb1 Tb1 95.43(6) . 3_665 ? 
O4 Tb1 Tb1 151.90(6) 2_655 3_665 ? 
Ni1 Tb1 Tb1 56.691(10) . 3_665 ? 
Ni1 Tb1 Tb1 114.621(10) 2_655 3_665 ? 
Tb1 Tb1 Tb1 60.0 2_655 3_665 ? 
O2 Ni1 O3 89.18(11) . . ? 
O2 Ni1 O8 89.53(11) . . ? 
O3 Ni1 O8 171.94(11) . . ? 
O2 Ni1 N1 88.54(12) . . ? 
O3 Ni1 N1 91.60(12) . . ? 
O8 Ni1 N1 96.32(13) . . ? 
O2 Ni1 O6 81.21(11) . 3_665 ? 
O3 Ni1 O6 80.19(11) . 3_665 ? 
O8 Ni1 O6 91.75(11) . 3_665 ? 
N1 Ni1 O6 166.91(13) . 3_665 ? 
O2 Ni1 N2 173.30(13) . . ? 
O3 Ni1 N2 94.19(12) . . ? 
O8 Ni1 N2 87.92(13) . . ? 
N1 Ni1 N2 85.58(14) . . ? 
O6 Ni1 N2 105.06(13) 3_665 . ? 
O2 Ni1 Tb1 39.08(8) . . ? 
O3 Ni1 Tb1 95.45(8) . . ? 
O8 Ni1 Tb1 78.61(8) . . ? 
N1 Ni1 Tb1 126.74(10) . . ? 
O6 Ni1 Tb1 45.09(8) 3_665 . ? 
N2 Ni1 Tb1 145.82(10) . . ? 
O2 Ni1 Tb1 85.47(8) . 3_665 ? 
O3 Ni1 Tb1 39.89(8) . 3_665 ? 
O8 Ni1 Tb1 132.06(8) . 3_665 ? 
N1 Ni1 Tb1 131.07(10) . 3_665 ? 
O6 Ni1 Tb1 40.36(8) 3_665 3_665 ? 
N2 Ni1 Tb1 100.83(10) . 3_665 ? 
Tb1 Ni1 Tb1 67.893(11) . 3_665 ? 
O10 Cl1 O9 109.53(16) . 3_665 ? 
O10 Cl1 O9 109.53(16) . . ? 
O9 Cl1 O9 109.41(16) 3_665 . ? 
O10 Cl1 O9 109.53(16) . 2_655 ? 
O9 Cl1 O9 109.41(16) 3_665 2_655 ? 
O9 Cl1 O9 109.41(16) . 2_655 ? 
C2 O1 C1 118.2(3) . . ? 
C2 O1 Tb1 109.8(2) . . ? 
C1 O1 Tb1 127.1(2) . . ? 
C8 O2 Ni1 129.1(2) . . ? 
C8 O2 Tb1 122.4(2) . . ? 
Ni1 O2 Tb1 106.60(11) . . ? 
C17 O3 Ni1 123.0(2) . . ? 
C17 O3 Tb1 127.2(2) . 3_665 ? 
Ni1 O3 Tb1 105.12(11) . 3_665 ? 
C16 O4 C18 116.3(3) . . ? 
C16 O4 Tb1 115.6(2) . 3_665 ? 
C18 O4 Tb1 128.1(2) . 3_665 ? 
Tb1 O5 Tb1 104.87(12) 2_655 . ? 
Tb1 O5 Tb1 104.87(12) 2_655 3_665 ? 
Tb1 O5 Tb1 104.87(12) . 3_665 ? 
Ni1 O6 Tb1 103.34(11) 2_655 . ? 
Ni1 O6 Tb1 97.11(11) 2_655 2_655 ? 
Tb1 O6 Tb1 108.15(11) . 2_655 ? 
C23 O7 Tb1 133.6(3) . . ? 
C23 O8 Ni1 129.2(3) . . ? 
C10 N1 C19 111.4(3) . . ? 
C10 N1 C9 107.6(3) . . ? 
C19 N1 C9 109.5(3) . . ? 
C10 N1 Ni1 114.3(3) . . ? 
C19 N1 Ni1 104.9(3) . . ? 
C9 N1 Ni1 109.1(3) . . ? 
C21 N2 C22 104.4(5) . . ? 
C21 N2 C20 113.1(5) . . ? 
C22 N2 C20 105.3(5) . . ? 
C21 N2 Ni1 114.5(3) . . ? 
C22 N2 Ni1 114.6(3) . . ? 
C20 N2 Ni1 104.8(3) . . ? 
C3 C2 O1 125.9(4) . . ? 
C3 C2 C8 121.3(4) . . ? 
O1 C2 C8 112.7(4) . . ? 
C2 C3 C4 119.5(4) . . ? 
C6 C4 C3 118.9(4) . . ? 
C6 C4 C5 120.8(4) . . ? 
C3 C4 C5 120.3(4) . . ? 
C4 C6 C7 122.0(4) . . ? 
C6 C7 C8 118.9(4) . . ? 
C6 C7 C9 120.6(4) . . ? 
C8 C7 C9 120.4(4) . . ? 
O2 C8 C7 123.8(4) . . ? 
O2 C8 C2 116.9(4) . . ? 
C7 C8 C2 119.3(4) . . ? 
N1 C9 C7 112.9(3) . . ? 
N1 C10 C11 116.7(4) . . ? 
C17 C11 C12 119.5(4) . . ? 
C17 C11 C10 120.3(4) . . ? 
C12 C11 C10 120.0(4) . . ? 
C13 C12 C11 122.0(4) . . ? 
C12 C13 C15 118.2(4) . . ? 
C12 C13 C14 120.7(4) . . ? 
C15 C13 C14 121.1(4) . . ? 
C16 C15 C13 120.3(4) . . ? 
O4 C16 C15 124.9(4) . . ? 
O4 C16 C17 113.8(4) . . ? 
C15 C16 C17 121.3(4) . . ? 
O3 C17 C11 122.7(4) . . ? 
O3 C17 C16 118.7(4) . . ? 
C11 C17 C16 118.6(4) . . ? 
C20 C19 N1 113.2(4) . . ? 
N2 C20 C19 113.2(5) . . ? 
O8 C23 O7 124.9(4) . . ? 
O8 C23 C24 118.1(4) . . ? 
O7 C23 C24 117.0(4) . . ? 
C27 C24 C26 109.5(5) . . ? 
C27 C24 C25 110.9(6) . . ? 
C26 C24 C25 108.5(5) . . ? 
C27 C24 C23 107.0(4) . . ? 
C26 C24 C23 110.5(4) . . ? 
C25 C24 C23 110.4(4) . . ? 
  
_diffrn_measured_fraction_theta_max    0.999 
_diffrn_reflns_theta_full              25.50 
_diffrn_measured_fraction_theta_full   0.999 
_refine_diff_density_max    2.085 
_refine_diff_density_min   -0.889 
_refine_diff_density_rms    0.111 


loop_
  _platon_squeeze_void_nr
  _platon_squeeze_void_average_x
  _platon_squeeze_void_average_y
  _platon_squeeze_void_average_z
  _platon_squeeze_void_volume
  _platon_squeeze_void_count_electrons
  _platon_squeeze_void_content
   1  0.000  0.000 -0.013      3983       518 ' '
_platon_squeeze_details
;
;


#=========#


  
data_Compound_3 
  
_audit_creation_method            SHELXL-97 
_chemical_name_systematic 
; 
 ? 
; 
_chemical_name_common             ? 
_chemical_melting_point           ? 
_chemical_formula_moiety          'C162 H240 Cl2 Gd6 N12 Ni6 O63' 
_chemical_formula_sum 
 'C162 H240 Cl2 Gd6 N12 Ni6 O63' 
_chemical_formula_weight          4730.20 
  
loop_ 
 _atom_type_symbol 
 _atom_type_description 
 _atom_type_scat_dispersion_real 
 _atom_type_scat_dispersion_imag 
 _atom_type_scat_source 
 'C'  'C'   0.0033   0.0016 
 'International Tables Vol C Tables 4.2.6.8 and 6.1.1.4' 
 'H'  'H'   0.0000   0.0000 
 'International Tables Vol C Tables 4.2.6.8 and 6.1.1.4' 
 'N'  'N'   0.0061   0.0033 
 'International Tables Vol C Tables 4.2.6.8 and 6.1.1.4' 
 'O'  'O'   0.0106   0.0060 
 'International Tables Vol C Tables 4.2.6.8 and 6.1.1.4' 
 'Cl'  'Cl'   0.1484   0.1585 
 'International Tables Vol C Tables 4.2.6.8 and 6.1.1.4' 
 'Ni'  'Ni'   0.3393   1.1124 
 'International Tables Vol C Tables 4.2.6.8 and 6.1.1.4' 
 'Gd'  'Gd'  -0.1653   3.9035 
 'International Tables Vol C Tables 4.2.6.8 and 6.1.1.4' 
  
_symmetry_cell_setting            Trigonal 
_symmetry_space_group_name_H-M    P-3c1 
  
loop_ 
 _symmetry_equiv_pos_as_xyz 
 'x, y, z' 
 '-y, x-y, z' 
 '-x+y, -x, z' 
 'x-y, -y, -z+1/2' 
 '-x, -x+y, -z+1/2' 
 'y, x, -z+1/2' 
 '-x, -y, -z' 
 'y, -x+y, -z' 
 'x-y, x, -z' 
 '-x+y, y, z-1/2' 
 'x, x-y, z-1/2' 
 '-y, -x, z-1/2' 
  
_cell_length_a                    25.212(5) 
_cell_length_b                    25.212(5) 
_cell_length_c                    22.745(5) 
_cell_angle_alpha                 90.000(5) 
_cell_angle_beta                  90.000(5) 
_cell_angle_gamma                 120.000(5) 
_cell_volume                      12521(4) 
_cell_formula_units_Z             2 
_cell_measurement_temperature     100(2) 
_cell_measurement_reflns_used     5021 
_cell_measurement_theta_min       2.41 
_cell_measurement_theta_max       26.54 
  
_exptl_crystal_description        block 
_exptl_crystal_colour             green 
_exptl_crystal_size_max           0.18 
_exptl_crystal_size_mid           0.16 
_exptl_crystal_size_min           0.14 
_exptl_crystal_density_meas       ? 
_exptl_crystal_density_diffrn     1.255 
_exptl_crystal_density_method     'not measured' 
_exptl_crystal_F_000              4772 
_exptl_absorpt_coefficient_mu     2.090 
_exptl_absorpt_correction_type    empirical 
_exptl_absorpt_correction_T_min   0.578814 
_exptl_absorpt_correction_T_max   1.00 
_exptl_absorpt_process_details    sadabs 
  
_exptl_special_details 
; 
 ? 
; 
  
_diffrn_ambient_temperature       100(2) 
_diffrn_radiation_wavelength      0.71069 
_diffrn_radiation_type            MoK\a 
_diffrn_radiation_source          'fine-focus sealed tube' 
_diffrn_radiation_monochromator   graphite 
_diffrn_measurement_device_type   'CCD area detector' 
_diffrn_measurement_method        'phi and omega scans' 
_diffrn_detector_area_resol_mean  ? 
_diffrn_standards_number          ? 
_diffrn_standards_interval_count  ? 
_diffrn_standards_interval_time   ? 
_diffrn_standards_decay_%         ? 
_diffrn_reflns_number             63177 
_diffrn_reflns_av_R_equivalents   0.1029 
_diffrn_reflns_av_sigmaI/netI     0.0475 
_diffrn_reflns_limit_h_min        -30 
_diffrn_reflns_limit_h_max        23 
_diffrn_reflns_limit_k_min        -30 
_diffrn_reflns_limit_k_max        28 
_diffrn_reflns_limit_l_min        -26 
_diffrn_reflns_limit_l_max        27 
_diffrn_reflns_theta_min          4.14 
_diffrn_reflns_theta_max          25.03 
_reflns_number_total              7343 
_reflns_number_gt                 6189 
_reflns_threshold_expression      >2sigma(I) 
  
_computing_data_collection        'Bruker SMART' 
_computing_cell_refinement        'Bruker SMART' 
_computing_data_reduction         'Bruker SAINT' 
_computing_structure_solution     'SHELXS-97 (Sheldrick, 1990)' 
_computing_structure_refinement   'SHELXL-97 (Sheldrick, 1997)' 
_computing_molecular_graphics     'Bruker SHELXTL' 
_computing_publication_material   'Bruker SHELXTL' 
  
_refine_special_details 
; 
 Refinement of F^2^ against ALL reflections.  The weighted R-factor wR and 
 goodness of fit S are based on F^2^, conventional R-factors R are based 
 on F, with F set to zero for negative F^2^. The threshold expression of 
 F^2^ > 2sigma(F^2^) is used only for calculating R-factors(gt) etc. and is 
 not relevant to the choice of reflections for refinement.  R-factors based 
 on F^2^ are statistically about twice as large as those based on F, and R- 
 factors based on ALL data will be even larger. 
; 
  
_refine_ls_structure_factor_coef  Fsqd 
_refine_ls_matrix_type            full 
_refine_ls_weighting_scheme       calc 
_refine_ls_weighting_details 
 'calc w=1/[\s^2^(Fo^2^)+(0.0770P)^2^+0.0000P] where P=(Fo^2^+2Fc^2^)/3' 
_atom_sites_solution_primary      direct 
_atom_sites_solution_secondary    difmap 
_atom_sites_solution_hydrogens    geom 
_refine_ls_hydrogen_treatment     mixed 
_refine_ls_extinction_method      none 
_refine_ls_extinction_coef        ? 
_refine_ls_number_reflns          7343 
_refine_ls_number_parameters      391 
_refine_ls_number_restraints      12 
_refine_ls_R_factor_all           0.0511 
_refine_ls_R_factor_gt            0.0431 
_refine_ls_wR_factor_ref          0.1192 
_refine_ls_wR_factor_gt           0.1154 
_refine_ls_goodness_of_fit_ref    1.033 
_refine_ls_restrained_S_all       1.034 
_refine_ls_shift/su_max           0.000 
_refine_ls_shift/su_mean          0.000 
  
loop_ 
 _atom_site_label 
 _atom_site_type_symbol 
 _atom_site_fract_x 
 _atom_site_fract_y 
 _atom_site_fract_z 
 _atom_site_U_iso_or_equiv 
 _atom_site_adp_type 
 _atom_site_occupancy 
 _atom_site_symmetry_multiplicity 
 _atom_site_calc_flag 
 _atom_site_refinement_flags 
 _atom_site_disorder_assembly 
 _atom_site_disorder_group 
Gd1 Gd 0.585360(9) 0.239079(9) 0.426793(10) 0.02196(10) Uani 1 1 d . . . 
Ni1 Ni 0.50027(2) 0.30864(2) 0.45039(3) 0.02265(15) Uani 1 1 d . . . 
Cl1 Cl 0.6667 0.3333 0.62359(9) 0.0371(5) Uani 1 3 d S . . 
O6 O 0.6667 0.3333 0.3832(2) 0.0229(11) Uani 1 3 d S . . 
O2 O 0.49753(13) 0.12611(13) 0.40139(14) 0.0266(7) Uani 1 1 d . . . 
O7 O 0.67429(13) 0.26186(13) 0.47722(16) 0.0227(7) Uani 1 1 d . . . 
O8 O 0.52219(14) 0.19691(13) 0.50774(14) 0.0285(7) Uani 1 1 d . . . 
O4 O 0.51262(12) 0.25739(13) 0.39024(12) 0.0226(6) Uani 1 1 d . . . 
O1 O 0.61482(12) 0.16898(12) 0.40000(13) 0.0231(7) Uani 1 1 d . . . 
O3 O 0.56414(14) 0.22607(14) 0.31306(14) 0.0270(7) Uani 1 1 d . . . 
C7 C 0.51659(19) 0.08846(19) 0.37655(19) 0.0243(10) Uani 1 1 d . . . 
O10 O 0.6667 0.3333 0.6861(2) 0.0396(14) Uani 1 3 d S . . 
N2 N 0.47637(16) 0.35812(17) 0.51251(16) 0.0281(9) Uani 1 1 d . . . 
O9 O 0.45643(13) 0.23205(13) 0.50545(13) 0.0273(7) Uani 1 1 d . . . 
O11 O 0.61553(16) 0.33894(17) 0.60251(16) 0.0470(10) Uani 1 1 d . . . 
C11 C 0.5027(2) 0.2065(2) 0.30187(19) 0.0252(10) Uani 1 1 d . . . 
N1 N 0.42054(16) 0.29221(16) 0.40471(16) 0.0266(8) Uani 1 1 d . . . 
C8 C 0.57964(19) 0.11280(19) 0.37616(19) 0.0239(10) Uani 1 1 d . . . 
C23 C 0.4759(2) 0.19907(19) 0.5263(2) 0.0287(10) Uani 1 1 d . . . 
C4 C 0.5013(2) -0.00466(19) 0.33113(19) 0.0265(10) Uani 1 1 d . . . 
C17 C 0.47637(19) 0.22530(19) 0.34494(19) 0.0244(10) Uani 1 1 d . . . 
C16 C 0.4148(2) 0.20757(19) 0.3417(2) 0.0275(10) Uani 1 1 d . . . 
C9 C 0.43218(19) 0.1005(2) 0.4083(2) 0.0277(10) Uani 1 1 d . . . 
H9A H 0.4130 0.0912 0.3703 0.042 Uiso 1 1 calc R . . 
H9B H 0.4243 0.1296 0.4279 0.042 Uiso 1 1 calc R . . 
H9C H 0.4158 0.0637 0.4312 0.042 Uiso 1 1 calc R . . 
C24 C 0.4427(2) 0.1592(2) 0.5798(2) 0.0384(12) Uani 1 1 d . . . 
C5 C 0.4601(2) -0.0675(2) 0.3061(2) 0.0345(11) Uani 1 1 d . . . 
H5A H 0.4378 -0.0954 0.3374 0.052 Uiso 1 1 calc R . . 
H5B H 0.4844 -0.0814 0.2860 0.052 Uiso 1 1 calc R . . 
H5C H 0.4318 -0.0659 0.2789 0.052 Uiso 1 1 calc R . . 
C15 C 0.3802(2) 0.1703(2) 0.2952(2) 0.0328(11) Uani 1 1 d . . . 
H15 H 0.3390 0.1588 0.2923 0.039 Uiso 1 1 calc R . . 
C3 C 0.5641(2) 0.0199(2) 0.3311(2) 0.0299(11) Uani 1 1 d . . . 
H3 H 0.5804 -0.0030 0.3156 0.036 Uiso 1 1 calc R . . 
C6 C 0.4776(2) 0.0302(2) 0.3536(2) 0.0282(10) Uani 1 1 d . . . 
H6 H 0.4355 0.0147 0.3534 0.034 Uiso 1 1 calc R . . 
C18 C 0.3841(2) 0.2260(2) 0.3891(2) 0.0289(10) Uani 1 1 d . . . 
H18A H 0.3440 0.2170 0.3752 0.035 Uiso 1 1 calc R . . 
H18B H 0.3782 0.2017 0.4240 0.035 Uiso 1 1 calc R . . 
C2 C 0.6038(2) 0.0782(2) 0.3538(2) 0.0269(10) Uani 1 1 d . . . 
C12 C 0.4679(2) 0.1690(2) 0.2560(2) 0.0298(10) Uani 1 1 d . . . 
H12 H 0.4860 0.1567 0.2275 0.036 Uiso 1 1 calc R . . 
C13 C 0.4059(2) 0.1500(2) 0.2529(2) 0.0344(11) Uani 1 1 d . . . 
C10 C 0.5976(2) 0.2127(2) 0.2693(2) 0.0320(11) Uani 1 1 d . . . 
H10A H 0.5796 0.1692 0.2654 0.048 Uiso 1 1 calc R . . 
H10B H 0.6395 0.2303 0.2812 0.048 Uiso 1 1 calc R . . 
H10C H 0.5956 0.2299 0.2322 0.048 Uiso 1 1 calc R . . 
C1 C 0.6716(2) 0.1047(2) 0.3495(2) 0.0293(10) Uani 1 1 d . . . 
H1A H 0.6793 0.0734 0.3336 0.035 Uiso 1 1 calc R . . 
H1B H 0.6873 0.1380 0.3213 0.035 Uiso 1 1 calc R . . 
C20 C 0.4257(3) 0.3627(3) 0.4844(3) 0.0584(17) Uani 1 1 d . . . 
H20A H 0.4427 0.3988 0.4594 0.070 Uiso 1 1 calc R . . 
H20B H 0.4012 0.3675 0.5146 0.070 Uiso 1 1 calc R . . 
C22 C 0.4599(4) 0.3309(3) 0.5705(3) 0.068(2) Uani 1 1 d . . . 
H22A H 0.4948 0.3316 0.5884 0.102 Uiso 1 1 calc R . . 
H22B H 0.4272 0.2892 0.5672 0.102 Uiso 1 1 calc R . . 
H22C H 0.4468 0.3536 0.5944 0.102 Uiso 1 1 calc R . . 
C19 C 0.3851(2) 0.3069(2) 0.4480(2) 0.0379(12) Uani 1 1 d . . . 
H19A H 0.3627 0.2721 0.4739 0.045 Uiso 1 1 calc R . . 
H19B H 0.3555 0.3136 0.4270 0.045 Uiso 1 1 calc R . . 
C21 C 0.5249(3) 0.4210(2) 0.5224(3) 0.0579(17) Uani 1 1 d . . . 
H21A H 0.5098 0.4417 0.5467 0.087 Uiso 1 1 calc R . . 
H21B H 0.5382 0.4419 0.4854 0.087 Uiso 1 1 calc R . . 
H21C H 0.5588 0.4210 0.5417 0.087 Uiso 1 1 calc R . . 
C14 C 0.3662(3) 0.1060(3) 0.2042(2) 0.0512(15) Uani 1 1 d . . . 
H14A H 0.3651 0.0676 0.2085 0.077 Uiso 1 1 calc R . . 
H14B H 0.3832 0.1233 0.1665 0.077 Uiso 1 1 calc R . . 
H14C H 0.3253 0.0994 0.2069 0.077 Uiso 1 1 calc R . . 
C27 C 0.3792(3) 0.1531(4) 0.5876(4) 0.096(3) Uani 1 1 d . . . 
H27A H 0.3515 0.1252 0.5587 0.144 Uiso 1 1 calc R . . 
H27B H 0.3826 0.1925 0.5827 0.144 Uiso 1 1 calc R . . 
H27C H 0.3640 0.1378 0.6263 0.144 Uiso 1 1 calc R . . 
C25 C 0.4327(3) 0.0947(2) 0.5723(3) 0.0548(16) Uani 1 1 d . . . 
H25A H 0.4107 0.0702 0.6057 0.082 Uiso 1 1 calc R . . 
H25B H 0.4716 0.0966 0.5694 0.082 Uiso 1 1 calc R . . 
H25C H 0.4094 0.0767 0.5372 0.082 Uiso 1 1 calc R . . 
C26 C 0.4830(4) 0.1890(3) 0.6337(3) 0.083(3) Uani 1 1 d . . . 
H26A H 0.4624 0.1660 0.6682 0.124 Uiso 1 1 calc R . . 
H26B H 0.4907 0.2302 0.6377 0.124 Uiso 1 1 calc R . . 
H26C H 0.5212 0.1896 0.6291 0.124 Uiso 1 1 calc R . . 
O12 O 0.0779(4) 0.0029(2) 0.5498(4) 0.164(4) Uani 1 1 d . . . 
O13 O 0.7171(6) 0.0000 0.2500 0.276(9) Uani 1 2 d SU . . 
O14 O 0.0000 0.0000 0.109(2) 0.47(2) Uani 1 3 d SU . . 
H96 H 0.6762(17) 0.2677(18) 0.5086(19) 0.000(11) Uiso 1 1 d . . . 
  
loop_ 
 _atom_site_aniso_label 
 _atom_site_aniso_U_11 
 _atom_site_aniso_U_22 
 _atom_site_aniso_U_33 
 _atom_site_aniso_U_23 
 _atom_site_aniso_U_13 
 _atom_site_aniso_U_12 
Gd1 0.01852(14) 0.01777(14) 0.02923(17) 0.00002(8) -0.00032(8) 0.00880(9) 
Ni1 0.0198(3) 0.0207(3) 0.0284(3) -0.0002(2) 0.0022(2) 0.0109(2) 
Cl1 0.0415(7) 0.0415(7) 0.0283(12) 0.000 0.000 0.0207(4) 
O6 0.0207(16) 0.0207(16) 0.027(3) 0.000 0.000 0.0104(8) 
O2 0.0199(15) 0.0190(15) 0.0369(19) 0.0033(13) 0.0002(13) 0.0067(13) 
O7 0.0245(17) 0.0223(17) 0.022(2) -0.0046(14) -0.0019(14) 0.0121(14) 
O8 0.0280(17) 0.0252(17) 0.0317(19) 0.0001(13) 0.0009(14) 0.0127(14) 
O4 0.0211(15) 0.0218(15) 0.0256(17) -0.0039(12) -0.0036(12) 0.0113(13) 
O1 0.0212(15) 0.0175(15) 0.0286(17) -0.0011(13) -0.0027(13) 0.0081(12) 
O3 0.0248(16) 0.0277(17) 0.0297(19) -0.0020(14) 0.0034(14) 0.0140(14) 
C7 0.025(2) 0.019(2) 0.024(2) 0.0005(18) 0.0007(18) 0.0070(19) 
O10 0.046(2) 0.046(2) 0.027(3) 0.000 0.000 0.0229(11) 
N2 0.028(2) 0.032(2) 0.030(2) 0.0036(17) 0.0073(16) 0.0189(17) 
O9 0.0275(16) 0.0217(16) 0.0328(19) 0.0026(13) 0.0050(13) 0.0124(14) 
O11 0.045(2) 0.061(3) 0.041(2) 0.0038(18) -0.0038(17) 0.031(2) 
C11 0.027(2) 0.025(2) 0.023(2) 0.0054(18) 0.0021(19) 0.012(2) 
N1 0.0226(19) 0.028(2) 0.033(2) -0.0040(16) -0.0024(16) 0.0148(17) 
C8 0.026(2) 0.018(2) 0.026(3) 0.0047(18) -0.0016(18) 0.0099(19) 
C23 0.034(3) 0.019(2) 0.028(3) -0.0015(19) 0.001(2) 0.010(2) 
C4 0.034(3) 0.018(2) 0.021(2) 0.0043(18) 0.0078(19) 0.008(2) 
C17 0.027(2) 0.019(2) 0.026(3) -0.0023(18) -0.0001(19) 0.0110(19) 
C16 0.027(2) 0.021(2) 0.035(3) -0.0033(19) -0.003(2) 0.012(2) 
C9 0.021(2) 0.024(2) 0.035(3) 0.006(2) 0.0046(19) 0.0094(19) 
C24 0.050(3) 0.032(3) 0.034(3) 0.008(2) 0.017(2) 0.020(2) 
C5 0.035(3) 0.025(2) 0.029(3) -0.004(2) -0.002(2) 0.004(2) 
C15 0.032(3) 0.034(3) 0.034(3) -0.003(2) -0.010(2) 0.018(2) 
C3 0.043(3) 0.025(2) 0.024(3) -0.0001(19) 0.002(2) 0.019(2) 
C6 0.025(2) 0.023(2) 0.029(3) 0.0049(19) -0.0012(19) 0.007(2) 
C18 0.020(2) 0.033(3) 0.034(3) -0.005(2) -0.0048(19) 0.014(2) 
C2 0.033(3) 0.025(2) 0.025(3) 0.0014(19) -0.0030(19) 0.016(2) 
C12 0.037(3) 0.028(2) 0.026(3) -0.0026(19) -0.002(2) 0.017(2) 
C13 0.041(3) 0.039(3) 0.028(3) -0.007(2) -0.006(2) 0.024(2) 
C10 0.034(3) 0.030(3) 0.035(3) -0.001(2) 0.010(2) 0.019(2) 
C1 0.031(2) 0.020(2) 0.037(3) -0.007(2) -0.003(2) 0.013(2) 
C20 0.052(4) 0.069(4) 0.063(4) -0.009(3) 0.010(3) 0.037(3) 
C22 0.133(6) 0.058(4) 0.034(4) 0.008(3) 0.020(4) 0.064(4) 
C19 0.027(3) 0.044(3) 0.047(3) -0.004(2) 0.004(2) 0.021(2) 
C21 0.073(4) 0.035(3) 0.055(4) -0.006(3) 0.028(3) 0.019(3) 
C14 0.052(4) 0.063(4) 0.038(3) -0.016(3) -0.011(3) 0.029(3) 
C27 0.090(6) 0.101(6) 0.123(7) 0.076(5) 0.077(5) 0.067(5) 
C25 0.077(4) 0.029(3) 0.053(4) 0.016(3) 0.020(3) 0.022(3) 
C26 0.131(7) 0.050(4) 0.032(4) 0.008(3) 0.011(4) 0.019(4) 
O12 0.195(8) 0.049(3) 0.239(9) 0.041(4) 0.139(7) 0.054(4) 
O13 0.247(12) 0.259(16) 0.325(19) -0.244(15) -0.122(8) 0.129(8) 
O14 0.50(3) 0.50(3) 0.41(4) 0.000 0.000 0.251(13) 
  
_geom_special_details 
; 
 All esds (except the esd in the dihedral angle between two l.s. planes) 
 are estimated using the full covariance matrix.  The cell esds are taken 
 into account individually in the estimation of esds in distances, angles 
 and torsion angles; correlations between esds in cell parameters are only 
 used when they are defined by crystal symmetry.  An approximate (isotropic) 
 treatment of cell esds is used for estimating esds involving l.s. planes. 
; 
  
loop_ 
 _geom_bond_atom_site_label_1 
 _geom_bond_atom_site_label_2 
 _geom_bond_distance 
 _geom_bond_site_symmetry_2 
 _geom_bond_publ_flag 
Gd1 O4 2.261(3) . ? 
Gd1 O1 2.315(3) . ? 
Gd1 O8 2.316(3) . ? 
Gd1 O7 2.321(3) . ? 
Gd1 O6 2.441(2) . ? 
Gd1 O7 2.443(3) 3_665 ? 
Gd1 O3 2.629(3) . ? 
Gd1 O2 2.654(3) . ? 
Gd1 Ni1 3.4245(9) . ? 
Gd1 Ni1 3.4724(9) 2_655 ? 
Gd1 Gd1 3.8643(9) 2_655 ? 
Gd1 Gd1 3.8644(8) 3_665 ? 
Ni1 O4 2.010(3) . ? 
Ni1 O1 2.064(3) 3_665 ? 
Ni1 O9 2.094(3) . ? 
Ni1 O7 2.110(3) 3_665 ? 
Ni1 N1 2.112(4) . ? 
Ni1 N2 2.161(4) . ? 
Ni1 Gd1 3.4724(9) 3_665 ? 
Cl1 O10 1.422(6) . ? 
Cl1 O11 1.447(3) 2_655 ? 
Cl1 O11 1.447(4) 3_665 ? 
Cl1 O11 1.447(4) . ? 
O6 Gd1 2.441(2) 2_655 ? 
O6 Gd1 2.441(2) 3_665 ? 
O2 C7 1.381(5) . ? 
O2 C9 1.447(5) . ? 
O7 Ni1 2.110(3) 2_655 ? 
O7 Gd1 2.443(3) 2_655 ? 
O8 C23 1.268(5) . ? 
O4 C17 1.346(5) . ? 
O1 C8 1.353(5) . ? 
O1 Ni1 2.064(3) 2_655 ? 
O3 C11 1.394(5) . ? 
O3 C10 1.449(5) . ? 
C7 C8 1.388(6) . ? 
C7 C6 1.398(6) . ? 
N2 C22 1.449(7) . ? 
N2 C21 1.457(6) . ? 
N2 C20 1.486(7) . ? 
O9 C23 1.250(5) . ? 
C11 C12 1.387(6) . ? 
C11 C17 1.392(6) . ? 
N1 C1 1.489(6) 3_665 ? 
N1 C18 1.491(5) . ? 
N1 C19 1.493(6) . ? 
C8 C2 1.388(6) . ? 
C23 C24 1.534(6) . ? 
C4 C3 1.382(6) . ? 
C4 C6 1.383(6) . ? 
C4 C5 1.507(6) . ? 
C17 C16 1.386(6) . ? 
C16 C15 1.393(6) . ? 
C16 C18 1.529(6) . ? 
C24 C25 1.524(7) . ? 
C24 C26 1.529(9) . ? 
C24 C27 1.540(8) . ? 
C15 C13 1.393(7) . ? 
C3 C2 1.399(6) . ? 
C2 C1 1.495(6) . ? 
C12 C13 1.390(7) . ? 
C13 C14 1.533(7) . ? 
C1 N1 1.489(6) 2_655 ? 
C20 C19 1.508(8) . ? 
  
loop_ 
 _geom_angle_atom_site_label_1 
 _geom_angle_atom_site_label_2 
 _geom_angle_atom_site_label_3 
 _geom_angle 
 _geom_angle_site_symmetry_1 
 _geom_angle_site_symmetry_3 
 _geom_angle_publ_flag 
O4 Gd1 O1 131.42(10) . . ? 
O4 Gd1 O8 86.81(10) . . ? 
O1 Gd1 O8 105.56(10) . . ? 
O4 Gd1 O7 155.92(10) . . ? 
O1 Gd1 O7 71.33(10) . . ? 
O8 Gd1 O7 94.48(11) . . ? 
O4 Gd1 O6 91.38(9) . . ? 
O1 Gd1 O6 101.69(8) . . ? 
O8 Gd1 O6 145.04(12) . . ? 
O7 Gd1 O6 73.89(11) . . ? 
O4 Gd1 O7 69.42(10) . 3_665 ? 
O1 Gd1 O7 159.00(10) . 3_665 ? 
O8 Gd1 O7 74.94(11) . 3_665 ? 
O7 Gd1 O7 87.67(15) . 3_665 ? 
O6 Gd1 O7 71.79(11) . 3_665 ? 
O4 Gd1 O3 61.87(9) . . ? 
O1 Gd1 O3 76.62(9) . . ? 
O8 Gd1 O3 132.43(10) . . ? 
O7 Gd1 O3 128.94(11) . . ? 
O6 Gd1 O3 75.02(13) . . ? 
O7 Gd1 O3 119.07(10) 3_665 . ? 
O4 Gd1 O2 79.19(9) . . ? 
O1 Gd1 O2 62.44(9) . . ? 
O8 Gd1 O2 70.56(10) . . ? 
O7 Gd1 O2 123.89(10) . . ? 
O6 Gd1 O2 143.16(13) . . ? 
O7 Gd1 O2 134.08(10) 3_665 . ? 
O3 Gd1 O2 69.10(9) . . ? 
O4 Gd1 Ni1 34.26(7) . . ? 
O1 Gd1 Ni1 162.64(7) . . ? 
O8 Gd1 Ni1 69.36(7) . . ? 
O7 Gd1 Ni1 124.81(8) . . ? 
O6 Gd1 Ni1 90.07(2) . . ? 
O7 Gd1 Ni1 37.69(7) 3_665 . ? 
O3 Gd1 Ni1 94.46(6) . . ? 
O2 Gd1 Ni1 100.58(6) . . ? 
O4 Gd1 Ni1 165.81(7) . 2_655 ? 
O1 Gd1 Ni1 35.09(7) . 2_655 ? 
O8 Gd1 Ni1 100.95(8) . 2_655 ? 
O7 Gd1 Ni1 36.30(8) . 2_655 ? 
O6 Gd1 Ni1 88.95(2) . 2_655 ? 
O7 Gd1 Ni1 123.91(8) 3_665 2_655 ? 
O3 Gd1 Ni1 104.64(6) . 2_655 ? 
O2 Gd1 Ni1 92.11(6) . 2_655 ? 
Ni1 Gd1 Ni1 159.92(2) . 2_655 ? 
O4 Gd1 Gd1 128.27(7) . 2_655 ? 
O1 Gd1 Gd1 80.88(7) . 2_655 ? 
O8 Gd1 Gd1 127.25(8) . 2_655 ? 
O7 Gd1 Gd1 36.86(8) . 2_655 ? 
O6 Gd1 Gd1 37.67(6) . 2_655 ? 
O7 Gd1 Gd1 82.45(7) 3_665 2_655 ? 
O3 Gd1 Gd1 100.24(7) . 2_655 ? 
O2 Gd1 Gd1 143.12(6) . 2_655 ? 
Ni1 Gd1 Gd1 115.693(10) . 2_655 ? 
Ni1 Gd1 Gd1 55.337(10) 2_655 2_655 ? 
O4 Gd1 Gd1 73.08(7) . 3_665 ? 
O1 Gd1 Gd1 138.15(7) . 3_665 ? 
O8 Gd1 Gd1 109.65(7) . 3_665 ? 
O7 Gd1 Gd1 83.92(7) . 3_665 ? 
O6 Gd1 Gd1 37.67(6) . 3_665 ? 
O7 Gd1 Gd1 34.73(8) 3_665 3_665 ? 
O3 Gd1 Gd1 95.13(7) . 3_665 ? 
O2 Gd1 Gd1 152.16(6) . 3_665 ? 
Ni1 Gd1 Gd1 56.514(10) . 3_665 ? 
Ni1 Gd1 Gd1 114.535(10) 2_655 3_665 ? 
Gd1 Gd1 Gd1 60.0 2_655 3_665 ? 
O4 Ni1 O1 88.96(12) . 3_665 ? 
O4 Ni1 O9 89.68(12) . . ? 
O1 Ni1 O9 172.45(12) 3_665 . ? 
O4 Ni1 O7 81.20(12) . 3_665 ? 
O1 Ni1 O7 80.68(12) 3_665 3_665 ? 
O9 Ni1 O7 91.78(12) . 3_665 ? 
O4 Ni1 N1 88.69(12) . . ? 
O1 Ni1 N1 91.56(13) 3_665 . ? 
O9 Ni1 N1 95.83(13) . . ? 
O7 Ni1 N1 167.32(14) 3_665 . ? 
O4 Ni1 N2 173.65(13) . . ? 
O1 Ni1 N2 93.81(13) 3_665 . ? 
O9 Ni1 N2 88.30(13) . . ? 
O7 Ni1 N2 104.87(14) 3_665 . ? 
N1 Ni1 N2 85.53(14) . . ? 
O4 Ni1 Gd1 39.30(8) . . ? 
O1 Ni1 Gd1 95.95(8) 3_665 . ? 
O9 Ni1 Gd1 78.37(8) . . ? 
O7 Ni1 Gd1 45.04(8) 3_665 . ? 
N1 Ni1 Gd1 126.94(10) . . ? 
N2 Ni1 Gd1 145.61(10) . . ? 
O4 Ni1 Gd1 85.32(8) . 3_665 ? 
O1 Ni1 Gd1 40.13(8) 3_665 3_665 ? 
O9 Ni1 Gd1 132.34(8) . 3_665 ? 
O7 Ni1 Gd1 40.61(9) 3_665 3_665 ? 
N1 Ni1 Gd1 131.29(10) . 3_665 ? 
N2 Ni1 Gd1 100.47(10) . 3_665 ? 
Gd1 Ni1 Gd1 68.149(12) . 3_665 ? 
O10 Cl1 O11 109.35(17) . 2_655 ? 
O10 Cl1 O11 109.35(17) . 3_665 ? 
O11 Cl1 O11 109.59(17) 2_655 3_665 ? 
O10 Cl1 O11 109.35(17) . . ? 
O11 Cl1 O11 109.59(17) 2_655 . ? 
O11 Cl1 O11 109.60(17) 3_665 . ? 
Gd1 O6 Gd1 104.65(12) 2_655 . ? 
Gd1 O6 Gd1 104.66(12) 2_655 3_665 ? 
Gd1 O6 Gd1 104.65(12) . 3_665 ? 
C7 O2 C9 116.6(3) . . ? 
C7 O2 Gd1 115.9(2) . . ? 
C9 O2 Gd1 127.5(2) . . ? 
Ni1 O7 Gd1 103.09(13) 2_655 . ? 
Ni1 O7 Gd1 97.28(12) 2_655 2_655 ? 
Gd1 O7 Gd1 108.41(14) . 2_655 ? 
C23 O8 Gd1 132.9(3) . . ? 
C17 O4 Ni1 129.1(3) . . ? 
C17 O4 Gd1 122.3(2) . . ? 
Ni1 O4 Gd1 106.44(12) . . ? 
C8 O1 Ni1 123.0(2) . 2_655 ? 
C8 O1 Gd1 127.7(2) . . ? 
Ni1 O1 Gd1 104.77(12) 2_655 . ? 
C11 O3 C10 117.7(4) . . ? 
C11 O3 Gd1 110.2(2) . . ? 
C10 O3 Gd1 126.9(3) . . ? 
O2 C7 C8 114.4(4) . . ? 
O2 C7 C6 124.9(4) . . ? 
C8 C7 C6 120.7(4) . . ? 
C22 N2 C21 105.1(5) . . ? 
C22 N2 C20 112.1(5) . . ? 
C21 N2 C20 105.6(5) . . ? 
C22 N2 Ni1 114.7(3) . . ? 
C21 N2 Ni1 113.9(3) . . ? 
C20 N2 Ni1 105.2(3) . . ? 
C23 O9 Ni1 129.6(3) . . ? 
C12 C11 C17 121.0(4) . . ? 
C12 C11 O3 126.2(4) . . ? 
C17 C11 O3 112.7(4) . . ? 
C1 N1 C18 107.9(3) 3_665 . ? 
C1 N1 C19 111.9(3) 3_665 . ? 
C18 N1 C19 108.9(3) . . ? 
C1 N1 Ni1 113.9(3) 3_665 . ? 
C18 N1 Ni1 109.3(3) . . ? 
C19 N1 Ni1 104.8(3) . . ? 
O1 C8 C2 122.8(4) . . ? 
O1 C8 C7 117.8(4) . . ? 
C2 C8 C7 119.4(4) . . ? 
O9 C23 O8 125.4(4) . . ? 
O9 C23 C24 118.0(4) . . ? 
O8 C23 C24 116.6(4) . . ? 
C3 C4 C6 118.5(4) . . ? 
C3 C4 C5 120.3(4) . . ? 
C6 C4 C5 121.2(4) . . ? 
O4 C17 C16 123.3(4) . . ? 
O4 C17 C11 116.6(4) . . ? 
C16 C17 C11 120.0(4) . . ? 
C17 C16 C15 118.7(4) . . ? 
C17 C16 C18 121.3(4) . . ? 
C15 C16 C18 119.9(4) . . ? 
C25 C24 C26 109.2(5) . . ? 
C25 C24 C23 110.9(4) . . ? 
C26 C24 C23 107.7(4) . . ? 
C25 C24 C27 107.3(5) . . ? 
C26 C24 C27 111.0(6) . . ? 
C23 C24 C27 110.8(4) . . ? 
C13 C15 C16 121.5(4) . . ? 
C4 C3 C2 121.9(4) . . ? 
C4 C6 C7 120.3(4) . . ? 
N1 C18 C16 112.7(4) . . ? 
C8 C2 C3 119.1(4) . . ? 
C8 C2 C1 120.4(4) . . ? 
C3 C2 C1 120.3(4) . . ? 
C11 C12 C13 119.5(4) . . ? 
C12 C13 C15 119.2(4) . . ? 
C12 C13 C14 120.1(4) . . ? 
C15 C13 C14 120.7(4) . . ? 
N1 C1 C2 117.3(4) 2_655 . ? 
N2 C20 C19 111.8(5) . . ? 
N1 C19 C20 112.5(4) . . ? 
  
_diffrn_measured_fraction_theta_max    0.995 
_diffrn_reflns_theta_full              25.03 
_diffrn_measured_fraction_theta_full   0.995 
_refine_diff_density_max    2.106 
_refine_diff_density_min   -0.732 
_refine_diff_density_rms    0.126 


loop_
  _platon_squeeze_void_nr
  _platon_squeeze_void_average_x
  _platon_squeeze_void_average_y
  _platon_squeeze_void_average_z
  _platon_squeeze_void_volume
  _platon_squeeze_void_count_electrons
  _platon_squeeze_void_content
   1  0.000  0.000 -0.003      3766      2023 ' '
_platon_squeeze_details
;
;


#========#


  
data_Compound_4 
  
_audit_creation_method            SHELXL-97 
_chemical_name_systematic 
; 
 ? 
; 
_chemical_name_common             ? 
_chemical_melting_point           ? 
_chemical_formula_moiety          'C162 H240 Cl2 Ho6 N12 Ni6 O61' 
_chemical_formula_sum 
 'C162 H240 Cl2 Ho6 N12 Ni6 O61' 
_chemical_formula_weight          4744.28 
  
loop_ 
 _atom_type_symbol 
 _atom_type_description 
 _atom_type_scat_dispersion_real 
 _atom_type_scat_dispersion_imag 
 _atom_type_scat_source 
 'C'  'C'   0.0033   0.0016 
 'International Tables Vol C Tables 4.2.6.8 and 6.1.1.4' 
 'H'  'H'   0.0000   0.0000 
 'International Tables Vol C Tables 4.2.6.8 and 6.1.1.4' 
 'N'  'N'   0.0061   0.0033 
 'International Tables Vol C Tables 4.2.6.8 and 6.1.1.4' 
 'O'  'O'   0.0106   0.0060 
 'International Tables Vol C Tables 4.2.6.8 and 6.1.1.4' 
 'Cl'  'Cl'   0.1484   0.1585 
 'International Tables Vol C Tables 4.2.6.8 and 6.1.1.4' 
 'Ni'  'Ni'   0.3393   1.1124 
 'International Tables Vol C Tables 4.2.6.8 and 6.1.1.4' 
 'Ho'  'Ho'  -0.2175   4.6783 
 'International Tables Vol C Tables 4.2.6.8 and 6.1.1.4' 
  
_symmetry_cell_setting            Trigonal 
_symmetry_space_group_name_H-M    P-3c1 
  
loop_ 
 _symmetry_equiv_pos_as_xyz 
 'x, y, z' 
 '-y, x-y, z' 
 '-x+y, -x, z' 
 'x-y, -y, -z+1/2' 
 '-x, -x+y, -z+1/2' 
 'y, x, -z+1/2' 
 '-x, -y, -z' 
 'y, -x+y, -z' 
 'x-y, x, -z' 
 '-x+y, y, z-1/2' 
 'x, x-y, z-1/2' 
 '-y, -x, z-1/2' 
  
_cell_length_a                    25.066(5) 
_cell_length_b                    25.066(5) 
_cell_length_c                    22.972(5) 
_cell_angle_alpha                 90.000(5) 
_cell_angle_beta                  90.000(5) 
_cell_angle_gamma                 120.000(5) 
_cell_volume                      12500(4) 
_cell_formula_units_Z             2 
_cell_measurement_temperature     100(2) 
_cell_measurement_reflns_used     8387 
_cell_measurement_theta_min       2.41 
_cell_measurement_theta_max       22.63 
  
_exptl_crystal_description        block 
_exptl_crystal_colour             green 
_exptl_crystal_size_max           0.20 
_exptl_crystal_size_mid           0.18 
_exptl_crystal_size_min           0.16 
_exptl_crystal_density_meas       ? 
_exptl_crystal_density_diffrn     1.260 
_exptl_crystal_density_method     'not measured' 
_exptl_crystal_F_000              4776 
_exptl_absorpt_coefficient_mu     2.400 
_exptl_absorpt_correction_type    empirical 
_exptl_absorpt_correction_T_min   0.527523 
_exptl_absorpt_correction_T_max   1.00 
_exptl_absorpt_process_details    sadabs 
  
_exptl_special_details 
; 
 ? 
; 
  
_diffrn_ambient_temperature       100(2) 
_diffrn_radiation_wavelength      0.71069 
_diffrn_radiation_type            MoK\a 
_diffrn_radiation_source          'fine-focus sealed tube' 
_diffrn_radiation_monochromator   graphite 
_diffrn_measurement_device_type   'CCD area detector' 
_diffrn_measurement_method        'phi and omega scans' 
_diffrn_detector_area_resol_mean  ? 
_diffrn_standards_number          ? 
_diffrn_standards_interval_count  ? 
_diffrn_standards_interval_time   ? 
_diffrn_standards_decay_%         ? 
_diffrn_reflns_number             63190 
_diffrn_reflns_av_R_equivalents   0.0807 
_diffrn_reflns_av_sigmaI/netI     0.0455 
_diffrn_reflns_limit_h_min        -25 
_diffrn_reflns_limit_h_max        29 
_diffrn_reflns_limit_k_min        -29 
_diffrn_reflns_limit_k_max        29 
_diffrn_reflns_limit_l_min        -27 
_diffrn_reflns_limit_l_max        27 
_diffrn_reflns_theta_min          4.09 
_diffrn_reflns_theta_max          25.02 
_reflns_number_total              7347 
_reflns_number_gt                 5935 
_reflns_threshold_expression      >2sigma(I) 
  
_computing_data_collection        'Bruker SMART' 
_computing_cell_refinement        'Bruker SMART' 
_computing_data_reduction         'Bruker SAINT' 
_computing_structure_solution     'SHELXS-97 (Sheldrick, 1990)' 
_computing_structure_refinement   'SHELXL-97 (Sheldrick, 1997)' 
_computing_molecular_graphics     'Bruker SHELXTL' 
_computing_publication_material   'Bruker SHELXTL' 
  
_refine_special_details 
; 
 Refinement of F^2^ against ALL reflections.  The weighted R-factor wR and 
 goodness of fit S are based on F^2^, conventional R-factors R are based 
 on F, with F set to zero for negative F^2^. The threshold expression of 
 F^2^ > 2sigma(F^2^) is used only for calculating R-factors(gt) etc. and is 
 not relevant to the choice of reflections for refinement.  R-factors based 
 on F^2^ are statistically about twice as large as those based on F, and R- 
 factors based on ALL data will be even larger. 
; 
  
_refine_ls_structure_factor_coef  Fsqd 
_refine_ls_matrix_type            full 
_refine_ls_weighting_scheme       calc 
_refine_ls_weighting_details 
 'calc w=1/[\s^2^(Fo^2^)+(0.1025P)^2^+0.0000P] where P=(Fo^2^+2Fc^2^)/3' 
_atom_sites_solution_primary      direct 
_atom_sites_solution_secondary    difmap 
_atom_sites_solution_hydrogens    geom 
_refine_ls_hydrogen_treatment     mixed 
_refine_ls_extinction_method      none 
_refine_ls_extinction_coef        ? 
_refine_ls_number_reflns          7347 
_refine_ls_number_parameters      370 
_refine_ls_number_restraints      7 
_refine_ls_R_factor_all           0.0623 
_refine_ls_R_factor_gt            0.0527 
_refine_ls_wR_factor_ref          0.1478 
_refine_ls_wR_factor_gt           0.1430 
_refine_ls_goodness_of_fit_ref    1.012 
_refine_ls_restrained_S_all       1.013 
_refine_ls_shift/su_max           0.002 
_refine_ls_shift/su_mean          0.000 
  
loop_ 
 _atom_site_label 
 _atom_site_type_symbol 
 _atom_site_fract_x 
 _atom_site_fract_y 
 _atom_site_fract_z 
 _atom_site_U_iso_or_equiv 
 _atom_site_adp_type 
 _atom_site_occupancy 
 _atom_site_symmetry_multiplicity 
 _atom_site_calc_flag 
 _atom_site_refinement_flags 
 _atom_site_disorder_assembly 
 _atom_site_disorder_group 
Ho1 Ho 0.653885(12) 0.240196(12) 0.426256(11) 0.02570(13) Uani 1 1 d . . . 
Ni1 Ni 0.50105(3) 0.19251(3) 0.44945(3) 0.0265(2) Uani 1 1 d . . . 
Cl1 Cl 0.6667 0.3333 0.62053(11) 0.0427(7) Uani 1 3 d S . . 
O6 O 0.6667 0.3333 0.3838(3) 0.0260(14) Uani 1 3 d S . . 
O5 O 0.58909(17) 0.26274(17) 0.47588(17) 0.0256(9) Uani 1 1 d D . . 
O2 O 0.65997(17) 0.22665(18) 0.31389(17) 0.0287(9) Uani 1 1 d . . . 
O3 O 0.63027(17) 0.12779(17) 0.40191(17) 0.0301(9) Uani 1 1 d . . . 
O10 O 0.6667 0.3333 0.6820(3) 0.047(2) Uani 1 3 d S . . 
O8 O 0.52540(19) 0.32725(19) 0.50614(18) 0.0337(9) Uani 1 1 d . . . 
O9 O 0.6153(2) 0.2766(2) 0.6001(2) 0.0500(12) Uani 1 1 d . . . 
O1 O 0.74298(17) 0.25671(17) 0.39031(15) 0.0263(8) Uani 1 1 d . . . 
O4 O 0.55577(17) 0.17024(17) 0.40008(16) 0.0278(9) Uani 1 1 d . . . 
N2 N 0.4759(3) 0.1186(3) 0.5109(3) 0.0520(9) Uani 1 1 d . . . 
O7 O 0.45813(18) 0.22619(19) 0.50482(16) 0.0323(9) Uani 1 1 d . . . 
C11 C 0.5737(3) 0.0895(3) 0.3761(2) 0.0281(13) Uani 1 1 d . . . 
C19 C 0.3850(3) 0.0781(3) 0.4457(3) 0.0520(9) Uani 1 1 d . . . 
H19A H 0.3610 0.0896 0.4705 0.062 Uiso 1 1 calc R . . 
H19B H 0.3564 0.0413 0.4244 0.062 Uiso 1 1 calc R . . 
C23 C 0.4786(3) 0.2791(3) 0.5258(3) 0.0362(15) Uani 1 1 d . . . 
C16 C 0.5345(3) 0.1142(3) 0.3761(2) 0.0285(13) Uani 1 1 d . . . 
C24 C 0.4464(3) 0.2863(3) 0.5791(3) 0.0441(17) Uani 1 1 d . . . 
C20 C 0.4248(3) 0.0637(3) 0.4827(3) 0.0520(9) Uani 1 1 d . . . 
H20A H 0.3997 0.0347 0.5126 0.062 Uiso 1 1 calc R . . 
H20B H 0.4420 0.0440 0.4589 0.062 Uiso 1 1 calc R . . 
C2 C 0.7912(3) 0.2070(3) 0.3406(3) 0.0319(13) Uani 1 1 d . . . 
C6 C 0.7017(3) 0.2068(3) 0.3018(2) 0.0314(13) Uani 1 1 d . . . 
C1 C 0.8407(3) 0.2258(3) 0.3879(3) 0.0356(14) Uani 1 1 d . . . 
H1A H 0.8218 0.2014 0.4225 0.043 Uiso 1 1 calc R . . 
H1B H 0.8717 0.2163 0.3744 0.043 Uiso 1 1 calc R . . 
N1 N 0.4208(2) 0.1289(2) 0.4035(2) 0.0307(11) Uani 1 1 d . . . 
C3 C 0.7885(3) 0.1709(3) 0.2939(3) 0.0391(15) Uani 1 1 d . . . 
H3 H 0.8181 0.1590 0.2909 0.047 Uiso 1 1 calc R . . 
C4 C 0.7439(3) 0.1521(3) 0.2516(3) 0.0415(16) Uani 1 1 d . . . 
C13 C 0.4958(3) -0.0037(3) 0.3312(3) 0.0332(14) Uani 1 1 d . . . 
C15 C 0.4756(3) 0.0792(3) 0.3530(2) 0.0322(14) Uani 1 1 d . . . 
C17 C 0.4740(3) -0.0670(3) 0.3064(3) 0.0427(16) Uani 1 1 d . . . 
H17A H 0.5050 -0.0657 0.2811 0.064 Uiso 1 1 calc R . . 
H17B H 0.4367 -0.0800 0.2848 0.064 Uiso 1 1 calc R . . 
H17C H 0.4663 -0.0955 0.3375 0.064 Uiso 1 1 calc R . . 
C10 C 0.6700(3) 0.1017(3) 0.4097(3) 0.0344(14) Uani 1 1 d . . . 
H10A H 0.6493 0.0652 0.4331 0.052 Uiso 1 1 calc R . . 
H10B H 0.7073 0.1312 0.4288 0.052 Uiso 1 1 calc R . . 
H10C H 0.6797 0.0915 0.3724 0.052 Uiso 1 1 calc R . . 
C14 C 0.4575(3) 0.0208(3) 0.3308(3) 0.0371(15) Uani 1 1 d . . . 
H14 H 0.4182 -0.0024 0.3151 0.044 Uiso 1 1 calc R . . 
C7 C 0.7470(3) 0.2246(3) 0.3457(2) 0.0301(13) Uani 1 1 d . . . 
C9 C 0.6128(3) 0.2141(3) 0.2710(3) 0.0352(15) Uani 1 1 d . . . 
H9A H 0.6318 0.2348 0.2353 0.053 Uiso 1 1 calc R . . 
H9B H 0.5863 0.2286 0.2851 0.053 Uiso 1 1 calc R . . 
H9C H 0.5891 0.1705 0.2642 0.053 Uiso 1 1 calc R . . 
C5 C 0.6999(3) 0.1708(3) 0.2549(3) 0.0375(15) Uani 1 1 d . . . 
H5 H 0.6699 0.1593 0.2262 0.045 Uiso 1 1 calc R . . 
C18 C 0.4342(3) 0.1059(3) 0.3486(2) 0.0332(14) Uani 1 1 d . . . 
H18A H 0.4525 0.1399 0.3212 0.040 Uiso 1 1 calc R . . 
H18B H 0.3954 0.0748 0.3322 0.040 Uiso 1 1 calc R . . 
C12 C 0.5544(3) 0.0308(3) 0.3542(2) 0.0312(13) Uani 1 1 d . . . 
H12 H 0.5808 0.0149 0.3551 0.037 Uiso 1 1 calc R . . 
C8 C 0.7390(4) 0.1095(4) 0.2021(3) 0.060(2) Uani 1 1 d . . . 
H8A H 0.7743 0.1040 0.2027 0.091 Uiso 1 1 calc R . . 
H8B H 0.7375 0.1274 0.1656 0.091 Uiso 1 1 calc R . . 
H8C H 0.7022 0.0703 0.2068 0.091 Uiso 1 1 calc R . . 
C21 C 0.4644(7) 0.1307(5) 0.5683(3) 0.111(5) Uani 1 1 d . . . 
H21A H 0.4329 0.1419 0.5676 0.166 Uiso 1 1 calc R . . 
H21B H 0.5015 0.1639 0.5845 0.166 Uiso 1 1 calc R . . 
H21C H 0.4509 0.0945 0.5917 0.166 Uiso 1 1 calc R . . 
C25 C 0.4863(5) 0.2958(5) 0.6318(3) 0.084(3) Uani 1 1 d . . . 
H25A H 0.4969 0.2640 0.6333 0.126 Uiso 1 1 calc R . . 
H25B H 0.4641 0.2943 0.6664 0.126 Uiso 1 1 calc R . . 
H25C H 0.5232 0.3352 0.6292 0.126 Uiso 1 1 calc R . . 
C22 C 0.5246(3) 0.1036(4) 0.5219(3) 0.0520(9) Uani 1 1 d . . . 
H22A H 0.5097 0.0695 0.5485 0.078 Uiso 1 1 calc R . . 
H22B H 0.5598 0.1387 0.5386 0.078 Uiso 1 1 calc R . . 
H22C H 0.5363 0.0927 0.4860 0.078 Uiso 1 1 calc R . . 
C26 C 0.4385(4) 0.3430(4) 0.5713(3) 0.071(3) Uani 1 1 d . . . 
H26A H 0.4782 0.3796 0.5699 0.107 Uiso 1 1 calc R . . 
H26B H 0.4154 0.3456 0.6035 0.107 Uiso 1 1 calc R . . 
H26C H 0.4168 0.3391 0.5357 0.107 Uiso 1 1 calc R . . 
C27 C 0.3811(5) 0.2297(5) 0.5855(5) 0.112(4) Uani 1 1 d . . . 
H27A H 0.3532 0.2342 0.5600 0.167 Uiso 1 1 calc R . . 
H27B H 0.3674 0.2267 0.6250 0.167 Uiso 1 1 calc R . . 
H27C H 0.3821 0.1930 0.5754 0.167 Uiso 1 1 calc R . . 
O11 O 0.7205(6) 0.0000 0.7500 0.177(5) Uani 1 2 d SU . . 
O12 O 0.0682(3) 0.0706(3) 0.5383(3) 0.094(2) Uani 1 1 d . . . 
H96 H 0.595(3) 0.270(3) 0.5129(11) 0.06(2) Uiso 1 1 d D . . 
  
loop_ 
 _atom_site_aniso_label 
 _atom_site_aniso_U_11 
 _atom_site_aniso_U_22 
 _atom_site_aniso_U_33 
 _atom_site_aniso_U_23 
 _atom_site_aniso_U_13 
 _atom_site_aniso_U_12 
Ho1 0.02374(18) 0.02311(18) 0.02992(19) 0.00022(10) 0.00081(10) 0.01147(13) 
Ni1 0.0255(4) 0.0238(4) 0.0291(4) 0.0026(3) 0.0033(3) 0.0115(3) 
Cl1 0.0479(11) 0.0479(11) 0.0321(14) 0.000 0.000 0.0240(5) 
O6 0.022(2) 0.022(2) 0.034(4) 0.000 0.000 0.0111(11) 
O5 0.022(2) 0.025(2) 0.028(2) 0.0008(17) 0.0002(17) 0.0105(17) 
O2 0.030(2) 0.033(2) 0.028(2) -0.0040(17) -0.0060(16) 0.019(2) 
O3 0.028(2) 0.026(2) 0.035(2) 0.0020(17) -0.0001(17) 0.0125(18) 
O10 0.058(3) 0.058(3) 0.025(4) 0.000 0.000 0.0291(16) 
O8 0.033(2) 0.036(2) 0.036(2) 0.0010(19) 0.0043(19) 0.020(2) 
O9 0.048(3) 0.048(3) 0.044(3) -0.008(2) -0.005(2) 0.017(3) 
O1 0.022(2) 0.028(2) 0.025(2) -0.0039(16) 0.0001(16) 0.0096(17) 
O4 0.027(2) 0.019(2) 0.032(2) -0.0003(16) 0.0044(17) 0.0081(17) 
N2 0.050(2) 0.050(2) 0.053(2) 0.0139(17) 0.0094(16) 0.0220(17) 
O7 0.030(2) 0.033(2) 0.035(2) 0.0051(18) 0.0046(17) 0.0160(19) 
C11 0.032(3) 0.027(3) 0.024(3) 0.006(2) 0.004(2) 0.014(3) 
C19 0.050(2) 0.050(2) 0.053(2) 0.0139(17) 0.0094(16) 0.0220(17) 
C23 0.041(4) 0.050(4) 0.033(3) 0.004(3) 0.002(3) 0.034(4) 
C16 0.033(3) 0.026(3) 0.027(3) 0.003(2) 0.005(2) 0.016(3) 
C24 0.045(4) 0.051(4) 0.047(4) 0.003(3) 0.015(3) 0.031(4) 
C20 0.050(2) 0.050(2) 0.053(2) 0.0139(17) 0.0094(16) 0.0220(17) 
C2 0.027(3) 0.033(3) 0.036(3) -0.001(3) 0.000(3) 0.016(3) 
C6 0.030(3) 0.037(3) 0.026(3) -0.001(3) 0.002(2) 0.015(3) 
C1 0.031(3) 0.042(4) 0.038(3) 0.003(3) -0.002(3) 0.022(3) 
N1 0.029(3) 0.025(3) 0.034(3) 0.006(2) 0.001(2) 0.011(2) 
C3 0.041(4) 0.044(4) 0.037(4) -0.004(3) 0.003(3) 0.026(3) 
C4 0.047(4) 0.047(4) 0.032(3) -0.008(3) 0.004(3) 0.025(3) 
C13 0.041(4) 0.026(3) 0.031(3) 0.002(3) 0.001(3) 0.015(3) 
C15 0.033(3) 0.031(3) 0.026(3) 0.001(2) 0.003(2) 0.011(3) 
C17 0.052(4) 0.029(4) 0.044(4) -0.011(3) -0.005(3) 0.018(3) 
C10 0.040(4) 0.031(3) 0.039(3) 0.007(3) 0.001(3) 0.022(3) 
C14 0.031(3) 0.031(3) 0.033(3) 0.004(3) 0.002(3) 0.004(3) 
C7 0.026(3) 0.029(3) 0.030(3) 0.000(2) 0.005(2) 0.010(3) 
C9 0.031(3) 0.038(4) 0.036(3) -0.001(3) -0.010(3) 0.017(3) 
C5 0.037(4) 0.044(4) 0.025(3) -0.006(3) 0.000(3) 0.016(3) 
C18 0.030(3) 0.032(3) 0.033(3) -0.006(3) -0.006(3) 0.011(3) 
C12 0.045(4) 0.021(3) 0.024(3) 0.003(2) 0.006(3) 0.013(3) 
C8 0.066(5) 0.073(6) 0.055(5) -0.023(4) -0.009(4) 0.044(5) 
C21 0.256(15) 0.098(8) 0.029(4) 0.015(5) 0.022(6) 0.126(10) 
C25 0.136(9) 0.141(9) 0.032(4) -0.004(5) 0.011(5) 0.114(8) 
C22 0.050(2) 0.050(2) 0.053(2) 0.0139(17) 0.0094(16) 0.0220(17) 
C26 0.106(7) 0.099(7) 0.054(5) 0.014(5) 0.026(5) 0.085(6) 
C27 0.104(9) 0.080(7) 0.132(10) 0.002(6) 0.087(8) 0.032(6) 
O11 0.175(6) 0.175(6) 0.181(7) -0.024(4) -0.012(2) 0.088(3) 
O12 0.095(5) 0.067(4) 0.106(6) 0.004(4) 0.047(4) 0.031(4) 
  
_geom_special_details 
; 
 All esds (except the esd in the dihedral angle between two l.s. planes) 
 are estimated using the full covariance matrix.  The cell esds are taken 
 into account individually in the estimation of esds in distances, angles 
 and torsion angles; correlations between esds in cell parameters are only 
 used when they are defined by crystal symmetry.  An approximate (isotropic) 
 treatment of cell esds is used for estimating esds involving l.s. planes. 
; 
  
loop_ 
 _geom_bond_atom_site_label_1 
 _geom_bond_atom_site_label_2 
 _geom_bond_distance 
 _geom_bond_site_symmetry_2 
 _geom_bond_publ_flag 
Ho1 O1 2.217(4) . ? 
Ho1 O4 2.274(4) . ? 
Ho1 O5 2.275(4) . ? 
Ho1 O8 2.280(4) 2_655 ? 
Ho1 O6 2.399(3) . ? 
Ho1 O5 2.412(4) 2_655 ? 
Ho1 O2 2.618(4) . ? 
Ho1 O3 2.633(4) . ? 
Ho1 Ni1 3.3834(10) 2_655 ? 
Ho1 Ni1 3.4365(10) . ? 
Ho1 Ho1 3.7966(9) 3_665 ? 
Ho1 Ho1 3.7967(9) 2_655 ? 
Ni1 O1 2.012(4) 3_665 ? 
Ni1 O4 2.060(4) . ? 
Ni1 O7 2.097(4) . ? 
Ni1 O5 2.110(4) . ? 
Ni1 N1 2.120(5) . ? 
Ni1 N2 2.157(6) . ? 
Ni1 Ho1 3.3835(10) 3_665 ? 
Cl1 O10 1.412(7) . ? 
Cl1 O9 1.438(5) 2_655 ? 
Cl1 O9 1.438(5) . ? 
Cl1 O9 1.438(5) 3_665 ? 
O6 Ho1 2.399(3) 3_665 ? 
O6 Ho1 2.399(3) 2_655 ? 
O5 Ho1 2.412(4) 3_665 ? 
O2 C6 1.392(7) . ? 
O2 C9 1.447(7) . ? 
O3 C11 1.388(7) . ? 
O3 C10 1.450(7) . ? 
O8 C23 1.273(8) . ? 
O8 Ho1 2.280(4) 3_665 ? 
O1 C7 1.338(6) . ? 
O1 Ni1 2.012(4) 2_655 ? 
O4 C16 1.346(7) . ? 
N2 C21 1.415(9) . ? 
N2 C22 1.469(9) . ? 
N2 C20 1.480(9) . ? 
O7 C23 1.256(7) . ? 
C11 C12 1.393(8) . ? 
C11 C16 1.398(8) . ? 
C19 C20 1.487(10) . ? 
C19 N1 1.491(8) . ? 
C23 C24 1.525(8) . ? 
C16 C15 1.390(8) . ? 
C24 C25 1.512(11) . ? 
C24 C26 1.540(10) . ? 
C24 C27 1.547(12) . ? 
C2 C3 1.383(8) . ? 
C2 C7 1.386(8) . ? 
C2 C1 1.535(8) . ? 
C6 C5 1.392(8) . ? 
C6 C7 1.415(8) . ? 
C1 N1 1.482(8) 2_655 ? 
N1 C1 1.482(8) 3_665 ? 
N1 C18 1.493(7) . ? 
C3 C4 1.374(9) . ? 
C4 C5 1.400(9) . ? 
C4 C8 1.522(9) . ? 
C13 C14 1.375(9) . ? 
C13 C12 1.382(8) . ? 
C13 C17 1.507(8) . ? 
C15 C14 1.395(9) . ? 
C15 C18 1.495(9) . ? 
  
loop_ 
 _geom_angle_atom_site_label_1 
 _geom_angle_atom_site_label_2 
 _geom_angle_atom_site_label_3 
 _geom_angle 
 _geom_angle_site_symmetry_1 
 _geom_angle_site_symmetry_3 
 _geom_angle_publ_flag 
O1 Ho1 O4 130.19(13) . . ? 
O1 Ho1 O5 156.62(14) . . ? 
O4 Ho1 O5 72.12(13) . . ? 
O1 Ho1 O8 87.92(14) . 2_655 ? 
O4 Ho1 O8 104.52(14) . 2_655 ? 
O5 Ho1 O8 92.89(14) . 2_655 ? 
O1 Ho1 O6 92.01(12) . . ? 
O4 Ho1 O6 102.11(11) . . ? 
O5 Ho1 O6 74.11(14) . . ? 
O8 Ho1 O6 144.98(16) 2_655 . ? 
O1 Ho1 O5 70.61(13) . 2_655 ? 
O4 Ho1 O5 159.09(13) . 2_655 ? 
O5 Ho1 O5 86.98(19) . 2_655 ? 
O8 Ho1 O5 75.31(14) 2_655 2_655 ? 
O6 Ho1 O5 71.71(14) . 2_655 ? 
O1 Ho1 O2 62.51(12) . . ? 
O4 Ho1 O2 75.52(12) . . ? 
O5 Ho1 O2 128.42(13) . . ? 
O8 Ho1 O2 133.99(14) 2_655 . ? 
O6 Ho1 O2 74.79(16) . . ? 
O5 Ho1 O2 120.10(13) 2_655 . ? 
O1 Ho1 O3 77.71(13) . . ? 
O4 Ho1 O3 62.67(12) . . ? 
O5 Ho1 O3 124.46(13) . . ? 
O8 Ho1 O3 70.37(13) 2_655 . ? 
O6 Ho1 O3 143.54(16) . . ? 
O5 Ho1 O3 133.55(12) 2_655 . ? 
O2 Ho1 O3 69.41(12) . . ? 
O1 Ho1 Ni1 34.83(9) . 2_655 ? 
O4 Ho1 Ni1 161.83(9) . 2_655 ? 
O5 Ho1 Ni1 124.64(10) . 2_655 ? 
O8 Ho1 Ni1 70.17(11) 2_655 2_655 ? 
O6 Ho1 Ni1 90.39(3) . 2_655 ? 
O5 Ho1 Ni1 38.28(9) 2_655 2_655 ? 
O2 Ho1 Ni1 95.49(8) . 2_655 ? 
O3 Ho1 Ni1 99.51(8) . 2_655 ? 
O1 Ho1 Ni1 165.07(9) . . ? 
O4 Ho1 Ni1 35.43(9) . . ? 
O5 Ho1 Ni1 36.73(10) . . ? 
O8 Ho1 Ni1 99.63(11) 2_655 . ? 
O6 Ho1 Ni1 89.12(3) . . ? 
O5 Ho1 Ni1 123.66(9) 2_655 . ? 
O2 Ho1 Ni1 103.58(8) . . ? 
O3 Ho1 Ni1 92.62(8) . . ? 
Ni1 Ho1 Ni1 160.08(3) 2_655 . ? 
O1 Ho1 Ho1 129.00(10) . 3_665 ? 
O4 Ho1 Ho1 81.41(9) . 3_665 ? 
O5 Ho1 Ho1 37.13(10) . 3_665 ? 
O8 Ho1 Ho1 126.25(11) 2_655 3_665 ? 
O6 Ho1 Ho1 37.68(8) . 3_665 ? 
O5 Ho1 Ho1 82.16(9) 2_655 3_665 ? 
O2 Ho1 Ho1 99.56(9) . 3_665 ? 
O3 Ho1 Ho1 143.91(8) . 3_665 ? 
Ni1 Ho1 Ho1 116.011(14) 2_655 3_665 ? 
Ni1 Ho1 Ho1 55.511(14) . 3_665 ? 
O1 Ho1 Ho1 73.98(10) . 2_655 ? 
O4 Ho1 Ho1 138.63(9) . 2_655 ? 
O5 Ho1 Ho1 83.84(10) . 2_655 ? 
O8 Ho1 Ho1 109.96(10) 2_655 2_655 ? 
O6 Ho1 Ho1 37.68(8) . 2_655 ? 
O5 Ho1 Ho1 34.70(9) 2_655 2_655 ? 
O2 Ho1 Ho1 95.50(9) . 2_655 ? 
O3 Ho1 Ho1 151.63(8) . 2_655 ? 
Ni1 Ho1 Ho1 56.839(14) 2_655 2_655 ? 
Ni1 Ho1 Ho1 114.705(14) . 2_655 ? 
Ho1 Ho1 Ho1 60.000(1) 3_665 2_655 ? 
O1 Ni1 O4 89.25(15) 3_665 . ? 
O1 Ni1 O7 89.58(15) 3_665 . ? 
O4 Ni1 O7 171.17(16) . . ? 
O1 Ni1 O5 81.06(15) 3_665 . ? 
O4 Ni1 O5 79.87(15) . . ? 
O7 Ni1 O5 91.30(16) . . ? 
O1 Ni1 N1 88.73(16) 3_665 . ? 
O4 Ni1 N1 91.84(17) . . ? 
O7 Ni1 N1 96.89(17) . . ? 
O5 Ni1 N1 166.88(17) . . ? 
O1 Ni1 N2 173.21(19) 3_665 . ? 
O4 Ni1 N2 94.3(2) . . ? 
O7 Ni1 N2 87.7(2) . . ? 
O5 Ni1 N2 105.2(2) . . ? 
N1 Ni1 N2 85.4(2) . . ? 
O1 Ni1 Ho1 39.01(10) 3_665 3_665 ? 
O4 Ni1 Ho1 95.41(10) . 3_665 ? 
O7 Ni1 Ho1 78.27(11) . 3_665 ? 
O5 Ni1 Ho1 45.08(10) . 3_665 ? 
N1 Ni1 Ho1 126.85(12) . 3_665 ? 
N2 Ni1 Ho1 145.82(17) . 3_665 ? 
O1 Ni1 Ho1 85.13(11) 3_665 . ? 
O4 Ni1 Ho1 39.78(10) . . ? 
O7 Ni1 Ho1 131.39(11) . . ? 
O5 Ni1 Ho1 40.14(11) . . ? 
N1 Ni1 Ho1 131.14(14) . . ? 
N2 Ni1 Ho1 101.31(16) . . ? 
Ho1 Ni1 Ho1 67.649(16) 3_665 . ? 
O10 Cl1 O9 109.0(2) . 2_655 ? 
O10 Cl1 O9 109.0(2) . . ? 
O9 Cl1 O9 109.9(2) 2_655 . ? 
O10 Cl1 O9 109.0(2) . 3_665 ? 
O9 Cl1 O9 109.9(2) 2_655 3_665 ? 
O9 Cl1 O9 109.9(2) . 3_665 ? 
Ho1 O6 Ho1 104.63(16) 3_665 . ? 
Ho1 O6 Ho1 104.63(16) 3_665 2_655 ? 
Ho1 O6 Ho1 104.63(16) . 2_655 ? 
Ni1 O5 Ho1 103.14(16) . . ? 
Ni1 O5 Ho1 96.65(14) . 3_665 ? 
Ho1 O5 Ho1 108.17(16) . 3_665 ? 
C6 O2 C9 117.6(4) . . ? 
C6 O2 Ho1 110.3(3) . . ? 
C9 O2 Ho1 127.3(3) . . ? 
C11 O3 C10 115.9(4) . . ? 
C11 O3 Ho1 115.8(3) . . ? 
C10 O3 Ho1 128.2(3) . . ? 
C23 O8 Ho1 133.4(4) . 3_665 ? 
C7 O1 Ni1 128.8(3) . 2_655 ? 
C7 O1 Ho1 123.1(3) . . ? 
Ni1 O1 Ho1 106.16(15) 2_655 . ? 
C16 O4 Ni1 122.5(3) . . ? 
C16 O4 Ho1 128.6(3) . . ? 
Ni1 O4 Ho1 104.80(16) . . ? 
C21 N2 C22 100.3(7) . . ? 
C21 N2 C20 115.6(7) . . ? 
C22 N2 C20 106.3(6) . . ? 
C21 N2 Ni1 115.4(5) . . ? 
C22 N2 Ni1 114.2(4) . . ? 
C20 N2 Ni1 104.9(4) . . ? 
C23 O7 Ni1 129.7(4) . . ? 
O3 C11 C12 125.4(5) . . ? 
O3 C11 C16 113.3(5) . . ? 
C12 C11 C16 121.2(5) . . ? 
C20 C19 N1 112.8(6) . . ? 
O7 C23 O8 124.1(6) . . ? 
O7 C23 C24 118.2(6) . . ? 
O8 C23 C24 117.7(6) . . ? 
O4 C16 C15 123.9(5) . . ? 
O4 C16 C11 117.6(5) . . ? 
C15 C16 C11 118.5(5) . . ? 
C25 C24 C23 108.3(6) . . ? 
C25 C24 C26 109.1(7) . . ? 
C23 C24 C26 109.6(6) . . ? 
C25 C24 C27 112.5(8) . . ? 
C23 C24 C27 110.3(6) . . ? 
C26 C24 C27 107.0(7) . . ? 
N2 C20 C19 113.5(6) . . ? 
C3 C2 C7 119.2(6) . . ? 
C3 C2 C1 121.2(5) . . ? 
C7 C2 C1 119.6(5) . . ? 
C5 C6 O2 126.8(5) . . ? 
C5 C6 C7 121.1(6) . . ? 
O2 C6 C7 112.0(5) . . ? 
N1 C1 C2 113.6(5) 2_655 . ? 
C1 N1 C19 109.7(5) 3_665 . ? 
C1 N1 C18 107.7(4) 3_665 . ? 
C19 N1 C18 112.1(5) . . ? 
C1 N1 Ni1 108.8(4) 3_665 . ? 
C19 N1 Ni1 105.0(4) . . ? 
C18 N1 Ni1 113.4(3) . . ? 
C4 C3 C2 122.5(6) . . ? 
C3 C4 C5 119.3(6) . . ? 
C3 C4 C8 122.3(6) . . ? 
C5 C4 C8 118.3(6) . . ? 
C14 C13 C12 118.9(6) . . ? 
C14 C13 C17 120.0(6) . . ? 
C12 C13 C17 121.1(6) . . ? 
C16 C15 C14 119.3(6) . . ? 
C16 C15 C18 119.8(5) . . ? 
C14 C15 C18 120.7(5) . . ? 
C13 C14 C15 122.1(6) . . ? 
O1 C7 C2 124.7(5) . . ? 
O1 C7 C6 116.4(5) . . ? 
C2 C7 C6 118.9(5) . . ? 
C6 C5 C4 118.9(6) . . ? 
N1 C18 C15 117.2(5) . . ? 
C13 C12 C11 119.9(6) . . ? 
  
_diffrn_measured_fraction_theta_max    0.995 
_diffrn_reflns_theta_full              25.02 
_diffrn_measured_fraction_theta_full   0.995 
_refine_diff_density_max    2.720 
_refine_diff_density_min   -1.309 
_refine_diff_density_rms    0.159 

loop_
  _platon_squeeze_void_nr
  _platon_squeeze_void_average_x
  _platon_squeeze_void_average_y
  _platon_squeeze_void_average_z
  _platon_squeeze_void_volume
  _platon_squeeze_void_count_electrons
  _platon_squeeze_void_content
   1  0.000  0.000 -0.014      3819      2154 ' '
_platon_squeeze_details
;
;


#=========#


  
data_Compound_5 
  
_audit_creation_method            SHELXL-97 
_chemical_name_systematic 
; 
 ? 
; 
_chemical_name_common             ? 
_chemical_melting_point           ? 
_chemical_formula_moiety          'C81 H120 Cl Er3 N6 Ni3 O29' 
_chemical_formula_sum 
 'C81 H120 Cl Er3 N6 Ni3 O29' 
_chemical_formula_weight          2355.13 
  
loop_ 
 _atom_type_symbol 
 _atom_type_description 
 _atom_type_scat_dispersion_real 
 _atom_type_scat_dispersion_imag 
 _atom_type_scat_source 
 'C'  'C'   0.0033   0.0016 
 'International Tables Vol C Tables 4.2.6.8 and 6.1.1.4' 
 'H'  'H'   0.0000   0.0000 
 'International Tables Vol C Tables 4.2.6.8 and 6.1.1.4' 
 'N'  'N'   0.0061   0.0033 
 'International Tables Vol C Tables 4.2.6.8 and 6.1.1.4' 
 'O'  'O'   0.0106   0.0060 
 'International Tables Vol C Tables 4.2.6.8 and 6.1.1.4' 
 'Cl'  'Cl'   0.1484   0.1585 
 'International Tables Vol C Tables 4.2.6.8 and 6.1.1.4' 
 'Ni'  'Ni'   0.3393   1.1124 
 'International Tables Vol C Tables 4.2.6.8 and 6.1.1.4' 
 'Er'  'Er'  -0.2586   4.9576 
 'International Tables Vol C Tables 4.2.6.8 and 6.1.1.4' 
  
_symmetry_cell_setting            Trigonal 
_symmetry_space_group_name_H-M    P-3c1 
  
loop_ 
 _symmetry_equiv_pos_as_xyz 
 'x, y, z' 
 '-y, x-y, z' 
 '-x+y, -x, z' 
 'x-y, -y, -z+1/2' 
 '-x, -x+y, -z+1/2' 
 'y, x, -z+1/2' 
 '-x, -y, -z' 
 'y, -x+y, -z' 
 'x-y, x, -z' 
 '-x+y, y, z-1/2' 
 'x, x-y, z-1/2' 
 '-y, -x, z-1/2' 
  
_cell_length_a                    24.964(5) 
_cell_length_b                    24.964(5) 
_cell_length_c                    23.036(5) 
_cell_angle_alpha                 90.000(5) 
_cell_angle_beta                  90.000(5) 
_cell_angle_gamma                 120.000(5) 
_cell_volume                      12433(4) 
_cell_formula_units_Z             4
_cell_measurement_temperature     100(2) 
_cell_measurement_reflns_used     9452 
_cell_measurement_theta_min       2.41 
_cell_measurement_theta_max       28.32 
  
_exptl_crystal_description        block 
_exptl_crystal_colour             green 
_exptl_crystal_size_max           0.22 
_exptl_crystal_size_mid           0.20 
_exptl_crystal_size_min           0.18 
_exptl_crystal_density_meas       ? 
_exptl_crystal_density_diffrn     1.258 
_exptl_crystal_density_method     'not measured' 
_exptl_crystal_F_000              4740 
_exptl_absorpt_coefficient_mu     2.527 
_exptl_absorpt_correction_type    empirical 
_exptl_absorpt_correction_T_min   0.7457 
_exptl_absorpt_correction_T_max   1.00 
_exptl_absorpt_process_details    sadabs 
  
_exptl_special_details 
; 
 ? 
; 
  
_diffrn_ambient_temperature       100(2) 
_diffrn_radiation_wavelength      0.71069 
_diffrn_radiation_type            MoK\a 
_diffrn_radiation_source          'fine-focus sealed tube' 
_diffrn_radiation_monochromator   graphite 
_diffrn_measurement_device_type   'CCD area detector' 
_diffrn_measurement_method        'phi and omega scans' 
_diffrn_detector_area_resol_mean  ? 
_diffrn_standards_number          ? 
_diffrn_standards_interval_count  ? 
_diffrn_standards_interval_time   ? 
_diffrn_standards_decay_%         ? 
_diffrn_reflns_number             109357 
_diffrn_reflns_av_R_equivalents   0.0604 
_diffrn_reflns_av_sigmaI/netI     0.0311 
_diffrn_reflns_limit_h_min        -33 
_diffrn_reflns_limit_h_max        33 
_diffrn_reflns_limit_k_min        -33 
_diffrn_reflns_limit_k_max        22 
_diffrn_reflns_limit_l_min        -30 
_diffrn_reflns_limit_l_max        30 
_diffrn_reflns_theta_min          2.00 
_diffrn_reflns_theta_max          28.38 
_reflns_number_total              10367 
_reflns_number_gt                 8734 
_reflns_threshold_expression      >2sigma(I) 
  
_computing_data_collection        'Bruker SMART' 
_computing_cell_refinement        'Bruker SMART' 
_computing_data_reduction         'Bruker SAINT' 
_computing_structure_solution     'SHELXS-97 (Sheldrick, 1990)' 
_computing_structure_refinement   'SHELXL-97 (Sheldrick, 1997)' 
_computing_molecular_graphics     'Bruker SHELXTL' 
_computing_publication_material   'Bruker SHELXTL' 
  
_refine_special_details 
; 
 Refinement of F^2^ against ALL reflections.  The weighted R-factor wR and 
 goodness of fit S are based on F^2^, conventional R-factors R are based 
 on F, with F set to zero for negative F^2^. The threshold expression of 
 F^2^ > 2sigma(F^2^) is used only for calculating R-factors(gt) etc. and is 
 not relevant to the choice of reflections for refinement.  R-factors based 
 on F^2^ are statistically about twice as large as those based on F, and R- 
 factors based on ALL data will be even larger. 
; 
  
_refine_ls_structure_factor_coef  Fsqd 
_refine_ls_matrix_type            full 
_refine_ls_weighting_scheme       calc 
_refine_ls_weighting_details 
 'calc w=1/[\s^2^(Fo^2^)+(0.0743P)^2^+100.1910P] where P=(Fo^2^+2Fc^2^)/3' 
_atom_sites_solution_primary      direct 
_atom_sites_solution_secondary    difmap 
_atom_sites_solution_hydrogens    geom 
_refine_ls_hydrogen_treatment     mixed 
_refine_ls_extinction_method      none 
_refine_ls_extinction_coef        ? 
_refine_ls_number_reflns          10367 
_refine_ls_number_parameters      418 
_refine_ls_number_restraints      31 
_refine_ls_R_factor_all           0.0715 
_refine_ls_R_factor_gt            0.0580 
_refine_ls_wR_factor_ref          0.1490 
_refine_ls_wR_factor_gt           0.1421 
_refine_ls_goodness_of_fit_ref    1.049 
_refine_ls_restrained_S_all       1.053 
_refine_ls_shift/su_max           0.000 
_refine_ls_shift/su_mean          0.000 
  
loop_ 
 _atom_site_label 
 _atom_site_type_symbol 
 _atom_site_fract_x 
 _atom_site_fract_y 
 _atom_site_fract_z 
 _atom_site_U_iso_or_equiv 
 _atom_site_adp_type 
 _atom_site_occupancy 
 _atom_site_symmetry_multiplicity 
 _atom_site_calc_flag 
 _atom_site_refinement_flags 
 _atom_site_disorder_assembly 
 _atom_site_disorder_group 
Er1 Er 0.586321(10) 0.240360(10) 0.427377(10) 0.01621(8) Uani 1 1 d . . . 
Ni1 Ni 0.50108(3) 0.30895(3) 0.45026(3) 0.01795(15) Uani 1 1 d . . . 
Cl1 Cl 0.6667 0.3333 0.62067(11) 0.0329(6) Uani 1 3 d S . . 
O5 O 0.6667 0.3333 0.3854(3) 0.0163(12) Uani 1 3 d S . . 
O1 O 0.56740(18) 0.22722(18) 0.31561(17) 0.0203(8) Uani 1 1 d . . . 
O6 O 0.67383(17) 0.26320(17) 0.47699(17) 0.0182(7) Uani 1 1 d DU . . 
O4 O 0.49605(18) 0.12730(18) 0.40253(17) 0.0210(8) Uani 1 1 d . . . 
O10 O 0.6667 0.3333 0.6822(3) 0.0369(19) Uani 1 3 d S . . 
O3 O 0.61430(17) 0.17011(18) 0.40131(17) 0.0196(8) Uani 1 1 d . . . 
O2 O 0.51362(17) 0.25669(17) 0.39179(16) 0.0191(7) Uani 1 1 d . . . 
O8 O 0.52549(19) 0.19804(19) 0.50636(17) 0.0245(8) Uani 1 1 d . . . 
O7 O 0.45801(18) 0.23242(19) 0.50476(17) 0.0245(8) Uani 1 1 d . . . 
O9 O 0.6153(3) 0.3389(3) 0.5996(2) 0.0425(12) Uani 1 1 d . . . 
C10 C 0.3848(3) 0.3069(3) 0.4462(3) 0.0345(14) Uani 1 1 d U . . 
H10A H 0.3606 0.2710 0.4706 0.041 Uiso 1 1 calc R . . 
H10B H 0.3562 0.3152 0.4250 0.041 Uiso 1 1 calc R . . 
N2 N 0.4754(2) 0.3575(2) 0.5113(2) 0.0240(10) Uani 1 1 d U . . 
C15 C 0.5146(2) 0.0896(3) 0.3773(2) 0.0197(11) Uani 1 1 d . . . 
C23 C 0.4791(3) 0.1998(3) 0.5253(3) 0.0263(12) Uani 1 1 d . . . 
C20 C 0.5787(2) 0.1142(3) 0.3775(2) 0.0204(11) Uani 1 1 d . . . 
C9 C 0.3844(3) 0.2248(3) 0.3883(3) 0.0244(12) Uani 1 1 d . . . 
H9A H 0.3789 0.2001 0.4227 0.000(11) Uiso 1 1 calc R . . 
H9B H 0.3438 0.2153 0.3749 0.000(11) Uiso 1 1 calc R . . 
C6 C 0.4154(3) 0.2075(3) 0.3419(3) 0.0227(11) Uani 1 1 d . . . 
C5 C 0.3822(3) 0.1719(3) 0.2943(3) 0.0281(13) Uani 1 1 d . . . 
H5 H 0.3407 0.1604 0.2905 0.000(11) Uiso 1 1 calc R . . 
C2 C 0.5060(3) 0.2078(3) 0.3035(2) 0.0203(11) Uani 1 1 d . . . 
C1 C 0.6021(3) 0.2153(3) 0.2729(2) 0.0255(12) Uani 1 1 d . . . 
H1A H 0.5846 0.1714 0.2684 0.000(11) Uiso 1 1 calc R . . 
H1B H 0.6443 0.2333 0.2853 0.000(12) Uiso 1 1 calc R . . 
H1C H 0.6005 0.2331 0.2365 0.000(11) Uiso 1 1 calc R . . 
C24 C 0.4452(3) 0.1587(3) 0.5786(3) 0.0366(16) Uani 1 1 d . . . 
C7 C 0.4781(2) 0.2253(3) 0.3465(2) 0.0201(11) Uani 1 1 d . . . 
C17 C 0.4989(3) -0.0036(3) 0.3309(2) 0.0245(12) Uani 1 1 d . . . 
C4 C 0.4094(3) 0.1533(3) 0.2526(3) 0.0291(13) Uani 1 1 d . . . 
C18 C 0.5621(3) 0.0206(3) 0.3315(3) 0.0263(12) Uani 1 1 d . . . 
H18 H 0.5783 -0.0028 0.3162 0.000(12) Uiso 1 1 calc R . . 
N1 N 0.4212(2) 0.2926(2) 0.4043(2) 0.0237(10) Uani 1 1 d . . . 
C21 C 0.6713(3) 0.1053(3) 0.3498(3) 0.0282(13) Uani 1 1 d . . . 
H21A H 0.6788 0.0736 0.3340 0.000(11) Uiso 1 1 calc R . . 
H21B H 0.6874 0.1390 0.3220 0.000(11) Uiso 1 1 calc R . . 
C26 C 0.3804(5) 0.1523(6) 0.5856(5) 0.090(4) Uani 1 1 d . . . 
H26A H 0.3600 0.1268 0.6187 0.000(12) Uiso 1 1 calc R . . 
H26B H 0.3563 0.1336 0.5513 0.000(11) Uiso 1 1 calc R . . 
H26C H 0.3850 0.1925 0.5911 0.000(11) Uiso 1 1 calc R . . 
C14 C 0.4309(3) 0.1012(3) 0.4106(3) 0.0278(13) Uani 1 1 d . . . 
H14A H 0.4109 0.0928 0.3734 0.000(11) Uiso 1 1 calc R . . 
H14B H 0.4231 0.1299 0.4315 0.000(11) Uiso 1 1 calc R . . 
H14C H 0.4150 0.0634 0.4323 0.000(11) Uiso 1 1 calc R . . 
C19 C 0.6025(3) 0.0789(3) 0.3541(2) 0.0228(11) Uani 1 1 d . . . 
C22 C 0.4570(3) -0.0666(3) 0.3057(3) 0.0330(14) Uani 1 1 d . . . 
H22A H 0.4815 -0.0832 0.2904 0.000(11) Uiso 1 1 calc R . . 
H22B H 0.4326 -0.0634 0.2752 0.000(11) Uiso 1 1 calc R . . 
H22C H 0.4302 -0.0935 0.3356 0.000(11) Uiso 1 1 calc R . . 
C3 C 0.4729(3) 0.1727(3) 0.2566(3) 0.0271(12) Uani 1 1 d . . . 
H3 H 0.4921 0.1620 0.2279 0.000(11) Uiso 1 1 calc R . . 
C16 C 0.4750(3) 0.0315(3) 0.3541(2) 0.0231(11) Uani 1 1 d . . . 
H16 H 0.4325 0.0161 0.3542 0.000(11) Uiso 1 1 calc R . . 
C8 C 0.3713(4) 0.1113(4) 0.2035(3) 0.0469(19) Uani 1 1 d . . . 
H8A H 0.3589 0.0693 0.2131 0.000(11) Uiso 1 1 calc R . . 
H8B H 0.3955 0.1230 0.1686 0.000(11) Uiso 1 1 calc R . . 
H8C H 0.3352 0.1151 0.1977 0.000(12) Uiso 1 1 calc R . . 
C11 C 0.4251(5) 0.3618(5) 0.4842(4) 0.060(2) Uani 1 1 d U . . 
H11A H 0.4423 0.3991 0.4609 0.072 Uiso 1 1 calc R . . 
H11B H 0.3998 0.3652 0.5143 0.072 Uiso 1 1 calc R . . 
C27 C 0.4848(4) 0.1895(5) 0.6308(3) 0.065(3) Uani 1 1 d . . . 
H27A H 0.4645 0.1661 0.6650 0.000(11) Uiso 1 1 calc R . . 
H27B H 0.4912 0.2306 0.6345 0.000(12) Uiso 1 1 calc R . . 
H27C H 0.5240 0.1915 0.6263 0.000(11) Uiso 1 1 calc R . . 
C13 C 0.4640(5) 0.3326(5) 0.5695(4) 0.096(5) Uani 1 1 d . . . 
H13A H 0.4451 0.3511 0.5920 0.000(12) Uiso 1 1 calc R . . 
H13B H 0.5024 0.3416 0.5871 0.000(12) Uiso 1 1 calc R . . 
H13C H 0.4369 0.2886 0.5679 0.000(11) Uiso 1 1 calc R . . 
C25 C 0.4378(4) 0.0954(5) 0.5716(4) 0.069(3) Uani 1 1 d . . . 
H25A H 0.4777 0.0992 0.5670 0.000(11) Uiso 1 1 calc R . . 
H25B H 0.4130 0.0758 0.5379 0.000(11) Uiso 1 1 calc R . . 
H25C H 0.4178 0.0710 0.6054 0.000(11) Uiso 1 1 calc R . . 
C12 C 0.5249(4) 0.4219(4) 0.5227(4) 0.060(2) Uani 1 1 d U . . 
H12A H 0.5072 0.4444 0.5403 0.000(11) Uiso 1 1 calc R . . 
H12B H 0.5444 0.4414 0.4868 0.000(11) Uiso 1 1 calc R . . 
H12C H 0.5550 0.4217 0.5484 0.000(11) Uiso 1 1 calc R . . 
O11 O 0.1001(2) 0.0039(3) 0.5839(2) 0.0389(12) Uani 1 1 d . . . 
H96 H 0.673(2) 0.268(2) 0.5196(9) 0.000(11) Uiso 1 1 d D . . 
  
loop_ 
 _atom_site_aniso_label 
 _atom_site_aniso_U_11 
 _atom_site_aniso_U_22 
 _atom_site_aniso_U_33 
 _atom_site_aniso_U_23 
 _atom_site_aniso_U_13 
 _atom_site_aniso_U_12 
Er1 0.01319(12) 0.01386(12) 0.02106(13) -0.00074(8) -0.00051(8) 0.00637(9) 
Ni1 0.0167(3) 0.0148(3) 0.0228(3) 0.0027(3) -0.0005(3) 0.0082(3) 
Cl1 0.0385(9) 0.0385(9) 0.0217(11) 0.000 0.000 0.0192(4) 
O5 0.0127(17) 0.0127(17) 0.024(3) 0.000 0.000 0.0063(9) 
O1 0.0217(19) 0.0170(18) 0.0211(19) 0.0045(15) 0.0033(15) 0.0089(16) 
O6 0.0171(11) 0.0161(11) 0.0230(11) 0.0000(8) -0.0012(8) 0.0096(8) 
O4 0.0172(18) 0.0191(19) 0.027(2) -0.0013(15) -0.0019(15) 0.0093(16) 
O10 0.043(3) 0.043(3) 0.026(4) 0.000 0.000 0.0213(15) 
O3 0.0144(18) 0.0165(18) 0.0256(19) -0.0018(15) 0.0010(15) 0.0060(15) 
O2 0.0198(19) 0.0182(18) 0.0213(18) 0.0016(15) 0.0039(15) 0.0111(16) 
O8 0.0195(19) 0.025(2) 0.026(2) 0.0016(16) -0.0055(16) 0.0089(17) 
O7 0.0179(19) 0.026(2) 0.028(2) 0.0052(17) -0.0032(16) 0.0099(17) 
O9 0.045(3) 0.053(3) 0.032(3) 0.001(2) -0.005(2) 0.027(3) 
C10 0.0353(17) 0.0336(17) 0.0356(17) 0.0030(9) 0.0017(9) 0.0178(11) 
N2 0.0243(13) 0.0240(13) 0.0238(13) 0.0021(9) 0.0004(9) 0.0122(9) 
C15 0.014(2) 0.019(3) 0.022(3) -0.005(2) -0.0033(19) 0.005(2) 
C23 0.016(3) 0.039(3) 0.024(3) 0.002(2) -0.002(2) 0.014(3) 
C20 0.015(2) 0.021(3) 0.023(3) -0.004(2) -0.001(2) 0.008(2) 
C9 0.023(3) 0.020(3) 0.035(3) 0.002(2) 0.002(2) 0.015(2) 
C6 0.019(3) 0.016(3) 0.030(3) -0.001(2) 0.000(2) 0.007(2) 
C5 0.029(3) 0.030(3) 0.031(3) -0.007(2) 0.002(2) 0.019(3) 
C2 0.018(3) 0.017(2) 0.023(3) -0.002(2) -0.003(2) 0.007(2) 
C1 0.028(3) 0.023(3) 0.025(3) 0.008(2) 0.002(2) 0.013(2) 
C24 0.029(3) 0.042(4) 0.031(3) 0.006(3) -0.011(3) 0.013(3) 
C7 0.016(2) 0.021(3) 0.022(3) -0.002(2) 0.000(2) 0.008(2) 
C17 0.016(3) 0.035(3) 0.019(3) -0.002(2) -0.001(2) 0.010(2) 
C4 0.031(3) 0.033(3) 0.026(3) -0.002(2) 0.006(2) 0.018(3) 
C18 0.015(3) 0.027(3) 0.028(3) -0.001(2) 0.000(2) 0.004(2) 
N1 0.025(2) 0.018(2) 0.032(3) 0.0028(19) 0.001(2) 0.013(2) 
C21 0.024(3) 0.021(3) 0.036(3) 0.004(2) 0.005(2) 0.008(2) 
C26 0.097(9) 0.080(8) 0.105(9) -0.015(7) -0.071(8) 0.054(7) 
C14 0.021(3) 0.030(3) 0.036(3) -0.002(3) -0.003(2) 0.016(3) 
C19 0.019(3) 0.021(3) 0.024(3) -0.002(2) 0.002(2) 0.007(2) 
C22 0.020(3) 0.045(4) 0.031(3) 0.004(3) 0.007(2) 0.013(3) 
C3 0.030(3) 0.025(3) 0.021(3) 0.000(2) 0.002(2) 0.010(3) 
C16 0.017(3) 0.033(3) 0.019(2) -0.006(2) -0.002(2) 0.012(2) 
C8 0.060(5) 0.059(5) 0.037(4) 0.007(4) 0.021(4) 0.041(4) 
C11 0.061(4) 0.059(4) 0.061(4) 0.001(3) 0.001(3) 0.030(3) 
C27 0.043(5) 0.111(9) 0.025(4) -0.001(4) -0.008(3) 0.027(5) 
C13 0.092(8) 0.070(7) 0.025(4) 0.012(4) -0.004(5) -0.036(6) 
C25 0.025(4) 0.083(7) 0.057(5) 0.025(5) -0.017(4) -0.004(4) 
C12 0.059(2) 0.060(2) 0.060(2) 0.0031(10) 0.0012(10) 0.0295(14) 
O11 0.018(2) 0.062(3) 0.041(3) -0.012(2) 0.0047(19) 0.022(2) 
  
_geom_special_details 
; 
 All esds (except the esd in the dihedral angle between two l.s. planes) 
 are estimated using the full covariance matrix.  The cell esds are taken 
 into account individually in the estimation of esds in distances, angles 
 and torsion angles; correlations between esds in cell parameters are only 
 used when they are defined by crystal symmetry.  An approximate (isotropic) 
 treatment of cell esds is used for estimating esds involving l.s. planes. 
; 
  
loop_ 
 _geom_bond_atom_site_label_1 
 _geom_bond_atom_site_label_2 
 _geom_bond_distance 
 _geom_bond_site_symmetry_2 
 _geom_bond_publ_flag 
Er1 O2 2.207(4) . ? 
Er1 O8 2.265(4) . ? 
Er1 O3 2.269(4) . ? 
Er1 O6 2.271(4) . ? 
Er1 O5 2.385(3) . ? 
Er1 O6 2.395(4) 3_665 ? 
Er1 O1 2.609(4) . ? 
Er1 O4 2.648(4) . ? 
Er1 Ni1 3.3736(10) . ? 
Er1 Ni1 3.4222(10) 2_655 ? 
Er1 Er1 3.7768(9) 2_655 ? 
Er1 Er1 3.7768(8) 3_665 ? 
Ni1 O2 2.006(4) . ? 
Ni1 O3 2.047(4) 3_665 ? 
Ni1 O7 2.080(4) . ? 
Ni1 N1 2.110(5) . ? 
Ni1 O6 2.115(4) 3_665 ? 
Ni1 N2 2.154(5) . ? 
Ni1 Er1 3.4221(10) 3_665 ? 
Cl1 O10 1.417(8) . ? 
Cl1 O9 1.440(5) 2_655 ? 
Cl1 O9 1.441(5) 3_665 ? 
Cl1 O9 1.441(5) . ? 
O5 Er1 2.385(3) 2_655 ? 
O5 Er1 2.385(3) 3_665 ? 
O1 C2 1.385(7) . ? 
O1 C1 1.437(7) . ? 
O6 Ni1 2.115(4) 2_655 ? 
O6 Er1 2.395(4) 2_655 ? 
O4 C15 1.370(7) . ? 
O4 C14 1.430(7) . ? 
O3 C20 1.341(7) . ? 
O3 Ni1 2.048(4) 2_655 ? 
O2 C7 1.339(6) . ? 
O8 C23 1.258(7) . ? 
O7 C23 1.262(7) . ? 
C10 N1 1.489(8) . ? 
C10 C11 1.509(12) . ? 
N2 C13 1.444(9) . ? 
N2 C11 1.452(11) . ? 
N2 C12 1.480(10) . ? 
C15 C16 1.389(8) . ? 
C15 C20 1.398(7) . ? 
C23 C24 1.551(9) . ? 
C20 C19 1.393(8) . ? 
C9 C6 1.504(8) . ? 
C9 N1 1.512(7) . ? 
C6 C5 1.393(8) . ? 
C6 C7 1.403(8) . ? 
C5 C4 1.383(8) . ? 
C2 C3 1.377(8) . ? 
C2 C7 1.401(8) . ? 
C24 C27 1.502(10) . ? 
C24 C25 1.505(13) . ? 
C24 C26 1.551(13) . ? 
C17 C18 1.377(8) . ? 
C17 C16 1.391(8) . ? 
C17 C22 1.502(9) . ? 
C4 C3 1.410(9) . ? 
C4 C8 1.512(10) . ? 
C18 C19 1.394(8) . ? 
N1 C21 1.484(8) 3_665 ? 
C21 N1 1.484(8) 2_655 ? 
C21 C19 1.504(8) . ? 
  
loop_ 
 _geom_angle_atom_site_label_1 
 _geom_angle_atom_site_label_2 
 _geom_angle_atom_site_label_3 
 _geom_angle 
 _geom_angle_site_symmetry_1 
 _geom_angle_site_symmetry_3 
 _geom_angle_publ_flag 
O2 Er1 O8 87.88(14) . . ? 
O2 Er1 O3 130.07(14) . . ? 
O8 Er1 O3 104.23(14) . . ? 
O2 Er1 O6 156.50(14) . . ? 
O8 Er1 O6 92.83(14) . . ? 
O3 Er1 O6 72.43(13) . . ? 
O2 Er1 O5 92.23(11) . . ? 
O8 Er1 O5 145.17(17) . . ? 
O3 Er1 O5 102.18(11) . . ? 
O6 Er1 O5 73.99(14) . . ? 
O2 Er1 O6 70.94(13) . 3_665 ? 
O8 Er1 O6 75.40(14) . 3_665 ? 
O3 Er1 O6 158.91(13) . 3_665 ? 
O6 Er1 O6 86.50(18) . 3_665 ? 
O5 Er1 O6 71.80(13) . 3_665 ? 
O2 Er1 O1 62.79(13) . . ? 
O8 Er1 O1 134.21(13) . . ? 
O3 Er1 O1 75.40(13) . . ? 
O6 Er1 O1 128.26(13) . . ? 
O5 Er1 O1 74.57(16) . . ? 
O6 Er1 O1 120.41(12) 3_665 . ? 
O2 Er1 O4 77.08(13) . . ? 
O8 Er1 O4 70.22(13) . . ? 
O3 Er1 O4 62.99(13) . . ? 
O6 Er1 O4 125.14(12) . . ? 
O5 Er1 O4 143.44(16) . . ? 
O6 Er1 O4 133.31(12) 3_665 . ? 
O1 Er1 O4 69.42(12) . . ? 
O2 Er1 Ni1 34.79(10) . . ? 
O8 Er1 Ni1 70.44(11) . . ? 
O3 Er1 Ni1 161.74(9) . . ? 
O6 Er1 Ni1 124.44(10) . . ? 
O5 Er1 Ni1 90.36(3) . . ? 
O6 Er1 Ni1 38.52(9) 3_665 . ? 
O1 Er1 Ni1 95.60(9) . . ? 
O4 Er1 Ni1 99.10(8) . . ? 
O2 Er1 Ni1 164.93(10) . 2_655 ? 
O8 Er1 Ni1 99.45(10) . 2_655 ? 
O3 Er1 Ni1 35.35(10) . 2_655 ? 
O6 Er1 Ni1 37.12(9) . 2_655 ? 
O5 Er1 Ni1 89.20(3) . 2_655 ? 
O6 Er1 Ni1 123.56(9) 3_665 2_655 ? 
O1 Er1 Ni1 103.29(9) . 2_655 ? 
O4 Er1 Ni1 92.93(8) . 2_655 ? 
Ni1 Er1 Ni1 160.26(2) . 2_655 ? 
O2 Er1 Er1 129.19(10) . 2_655 ? 
O8 Er1 Er1 126.34(10) . 2_655 ? 
O3 Er1 Er1 81.46(9) . 2_655 ? 
O6 Er1 Er1 37.09(10) . 2_655 ? 
O5 Er1 Er1 37.64(8) . 2_655 ? 
O6 Er1 Er1 82.11(9) 3_665 2_655 ? 
O1 Er1 Er1 99.21(9) . 2_655 ? 
O4 Er1 Er1 144.24(8) . 2_655 ? 
Ni1 Er1 Er1 116.036(13) . 2_655 ? 
Ni1 Er1 Er1 55.626(13) 2_655 2_655 ? 
O2 Er1 Er1 74.15(10) . 3_665 ? 
O8 Er1 Er1 110.25(11) . 3_665 ? 
O3 Er1 Er1 138.68(9) . 3_665 ? 
O6 Er1 Er1 83.63(9) . 3_665 ? 
O5 Er1 Er1 37.64(8) . 3_665 ? 
O6 Er1 Er1 34.87(9) 3_665 3_665 ? 
O1 Er1 Er1 95.35(8) . 3_665 ? 
O4 Er1 Er1 151.16(8) . 3_665 ? 
Ni1 Er1 Er1 56.852(13) . 3_665 ? 
Ni1 Er1 Er1 114.830(13) 2_655 3_665 ? 
Er1 Er1 Er1 60.0 2_655 3_665 ? 
O2 Ni1 O3 89.47(15) . 3_665 ? 
O2 Ni1 O7 89.14(16) . . ? 
O3 Ni1 O7 171.28(15) 3_665 . ? 
O2 Ni1 N1 88.64(17) . . ? 
O3 Ni1 N1 91.63(17) 3_665 . ? 
O7 Ni1 N1 96.94(17) . . ? 
O2 Ni1 O6 80.91(15) . 3_665 ? 
O3 Ni1 O6 80.22(15) 3_665 3_665 ? 
O7 Ni1 O6 91.07(15) . 3_665 ? 
N1 Ni1 O6 166.75(18) . 3_665 ? 
O2 Ni1 N2 172.83(18) . . ? 
O3 Ni1 N2 94.57(17) 3_665 . ? 
O7 Ni1 N2 87.74(18) . . ? 
N1 Ni1 N2 85.33(19) . . ? 
O6 Ni1 N2 105.59(17) 3_665 . ? 
O2 Ni1 Er1 38.90(11) . . ? 
O3 Ni1 Er1 95.38(11) 3_665 . ? 
O7 Ni1 Er1 78.21(12) . . ? 
N1 Ni1 Er1 126.73(13) . . ? 
O6 Ni1 Er1 44.85(10) 3_665 . ? 
N2 Ni1 Er1 145.98(13) . . ? 
O2 Ni1 Er1 85.18(11) . 3_665 ? 
O3 Ni1 Er1 39.87(11) 3_665 3_665 ? 
O7 Ni1 Er1 131.41(11) . 3_665 ? 
N1 Ni1 Er1 130.99(14) . 3_665 ? 
O6 Ni1 Er1 40.38(10) 3_665 3_665 ? 
N2 Ni1 Er1 101.70(13) . 3_665 ? 
Er1 Ni1 Er1 67.521(15) . 3_665 ? 
O10 Cl1 O9 109.7(2) . 2_655 ? 
O10 Cl1 O9 109.7(2) . 3_665 ? 
O9 Cl1 O9 109.3(2) 2_655 3_665 ? 
O10 Cl1 O9 109.7(2) . . ? 
O9 Cl1 O9 109.3(2) 2_655 . ? 
O9 Cl1 O9 109.3(2) 3_665 . ? 
Er1 O5 Er1 104.71(16) 2_655 . ? 
Er1 O5 Er1 104.71(16) 2_655 3_665 ? 
Er1 O5 Er1 104.71(16) . 3_665 ? 
C2 O1 C1 117.7(4) . . ? 
C2 O1 Er1 110.0(3) . . ? 
C1 O1 Er1 127.8(3) . . ? 
Ni1 O6 Er1 102.50(16) 2_655 . ? 
Ni1 O6 Er1 96.62(14) 2_655 2_655 ? 
Er1 O6 Er1 108.04(15) . 2_655 ? 
C15 O4 C14 116.2(4) . . ? 
C15 O4 Er1 115.1(3) . . ? 
C14 O4 Er1 128.7(3) . . ? 
C20 O3 Ni1 123.3(3) . 2_655 ? 
C20 O3 Er1 127.8(3) . . ? 
Ni1 O3 Er1 104.78(16) 2_655 . ? 
C7 O2 Ni1 129.1(3) . . ? 
C7 O2 Er1 123.1(3) . . ? 
Ni1 O2 Er1 106.31(16) . . ? 
C23 O8 Er1 132.6(4) . . ? 
C23 O7 Ni1 128.9(4) . . ? 
N1 C10 C11 112.5(6) . . ? 
C13 N2 C11 116.0(8) . . ? 
C13 N2 C12 100.4(6) . . ? 
C11 N2 C12 106.2(6) . . ? 
C13 N2 Ni1 114.4(6) . . ? 
C11 N2 Ni1 105.8(5) . . ? 
C12 N2 Ni1 113.9(5) . . ? 
O4 C15 C16 124.9(5) . . ? 
O4 C15 C20 113.8(5) . . ? 
C16 C15 C20 121.4(5) . . ? 
O8 C23 O7 125.5(6) . . ? 
O8 C23 C24 117.3(5) . . ? 
O7 C23 C24 117.2(5) . . ? 
O3 C20 C19 123.1(5) . . ? 
O3 C20 C15 118.4(5) . . ? 
C19 C20 C15 118.5(5) . . ? 
C6 C9 N1 112.5(5) . . ? 
C5 C6 C7 118.4(5) . . ? 
C5 C6 C9 121.1(5) . . ? 
C7 C6 C9 120.5(5) . . ? 
C4 C5 C6 121.7(6) . . ? 
C3 C2 O1 126.0(5) . . ? 
C3 C2 C7 121.3(5) . . ? 
O1 C2 C7 112.6(5) . . ? 
C27 C24 C25 109.1(7) . . ? 
C27 C24 C23 107.1(6) . . ? 
C25 C24 C23 110.5(7) . . ? 
C27 C24 C26 110.8(8) . . ? 
C25 C24 C26 109.1(7) . . ? 
C23 C24 C26 110.4(6) . . ? 
O2 C7 C2 116.5(5) . . ? 
O2 C7 C6 123.5(5) . . ? 
C2 C7 C6 119.9(5) . . ? 
C18 C17 C16 118.5(6) . . ? 
C18 C17 C22 120.5(6) . . ? 
C16 C17 C22 121.0(5) . . ? 
C5 C4 C3 119.7(6) . . ? 
C5 C4 C8 120.5(6) . . ? 
C3 C4 C8 119.7(6) . . ? 
C17 C18 C19 122.3(6) . . ? 
C21 N1 C10 112.0(5) 3_665 . ? 
C21 N1 C9 107.5(5) 3_665 . ? 
C10 N1 C9 108.9(5) . . ? 
C21 N1 Ni1 114.3(4) 3_665 . ? 
C10 N1 Ni1 105.0(4) . . ? 
C9 N1 Ni1 109.0(3) . . ? 
N1 C21 C19 116.8(5) 2_655 . ? 
C20 C19 C18 119.4(5) . . ? 
C20 C19 C21 120.2(5) . . ? 
C18 C19 C21 120.3(5) . . ? 
C2 C3 C4 118.9(6) . . ? 
C15 C16 C17 120.0(5) . . ? 
N2 C11 C10 113.1(7) . . ? 
  
_diffrn_measured_fraction_theta_max    0.995 
_diffrn_reflns_theta_full              28.38 
_diffrn_measured_fraction_theta_full   0.995 
_refine_diff_density_max    3.839 
_refine_diff_density_min   -1.957 
_refine_diff_density_rms    0.189 

loop_
  _platon_squeeze_void_nr
  _platon_squeeze_void_average_x
  _platon_squeeze_void_average_y
  _platon_squeeze_void_average_z
  _platon_squeeze_void_volume
  _platon_squeeze_void_count_electrons
  _platon_squeeze_void_content
   1  0.000  0.000  0.000        22         9 ' '
   2  0.000  0.000  0.006      4091       625 ' '
   3  0.000  0.000  0.500        22         9 ' '
_platon_squeeze_details
;
;
